## RESEARCH ARTICLE

# An incoherent feedforward loop formed by SirA/BarA, HilE and HilD is involved in controlling the growth cost of virulence factor expression by *Salmonella* Typhimurium

Deyanira Pérez-Morales<sup>1,2</sup>, Jessica Nava-Galeana<sup>1</sup>, Roberto Rosales-Reyes<sup>3</sup>, Paige Teehan<sup>4</sup>, Helen Yakhnin<sup>4</sup>, Erika I. Melchy-Pérez<sup>5</sup>, Yvonne Rosenstein<sup>5</sup>, Miguel A. De la Cruz<sup>6</sup>, Paul Babitzke<sup>4</sup>, Víctor H. Bustamante<sup>1\*</sup>

**1** Departamento de Microbiología Molecular, Instituto de Biotecnología, Universidad Nacional Autónoma de México, Cuernavaca, Morelos, México, **2** Consejo Nacional de Ciencia y Tecnología, Ciudad de México, México, **3** Unidad de Investigación en Medicina Experimental, Facultad de Medicina, Universidad Nacional Autónoma de México, Ciudad de México, México, **4** Department of Biochemistry and Molecular Biology, Center for RNA Molecular Biology, The Pennsylvania State University, University Park, Pennsylvania, United States of America, **5** Departamento de Medicina Molecular y Bioprocesos, Instituto de Biotecnología, Universidad Nacional Autónoma de México, Cuernavaca, Morelos, México, **6** Unidad de Investigación Médica en Enfermedades Infecciosas y Parasitarias, Hospital de Pediatría, Centro Médico Nacional Siglo XXI, Instituto Mexicano del Seguro Social, Ciudad de México, México

\* [victor.bustamante@ibt.unam.mx](mailto:victor.bustamante@ibt.unam.mx)

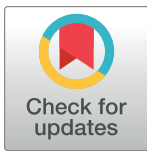

## OPEN ACCESS

**Citation:** Pérez-Morales D, Nava-Galeana J, Rosales-Reyes R, Teehan P, Yakhnin H, Melchy-Pérez EI, et al. (2021) An incoherent feedforward loop formed by SirA/BarA, HilE and HilD is involved in controlling the growth cost of virulence factor expression by *Salmonella* Typhimurium. *PLoS Pathog* 17(5): e1009630. <https://doi.org/10.1371/journal.ppat.1009630>

**Editor:** William Navarre, University of Toronto, CANADA

**Received:** July 2, 2020

**Accepted:** May 10, 2021

**Published:** May 28, 2021

**Copyright:** © 2021 Pérez-Morales et al. This is an open access article distributed under the terms of the [Creative Commons Attribution License](https://creativecommons.org/licenses/by/4.0/), which permits unrestricted use, distribution, and reproduction in any medium, provided the original author and source are credited.

**Data Availability Statement:** All relevant data are within the manuscript.

**Funding:** This work was supported by grants from Consejo Nacional de Ciencia y Tecnología (CONACYT) / México (254531) and Dirección General de Asuntos del Personal Académico de la UNAM / México (IN202418) to V.H.B., from Consejo Nacional de Ciencia y Tecnología (CONACYT) / México (256263) to M.A.D.C., and

## Abstract

An intricate regulatory network controls the expression of *Salmonella* virulence genes. The transcriptional regulator HilD plays a central role in this network by controlling the expression of tens of genes mainly required for intestinal colonization. Accordingly, the expression/activity of HilD is highly regulated by multiple factors, such as the SirA/BarA two-component system and the Hcp-like protein HilE. SirA/BarA positively regulates translation of *hilD* mRNA through a regulatory cascade involving the small RNAs CsrB and CsrC, and the RNA-binding protein CsrA, whereas HilE inhibits HilD activity by protein-protein interaction. In this study, we show that SirA/BarA also positively regulates translation of *hilE* mRNA through the same mentioned regulatory cascade. Thus, our results reveal a paradoxical regulation exerted by SirA/BarA-Csr on HilD, which involves simultaneous opposite effects, direct positive control and indirect negative control through HilE. This kind of regulation is called an incoherent type-1 feedforward loop (I1-FFL), which is a motif present in certain regulatory networks and represents a complex biological problem to decipher. Interestingly, our results, together with those from a previous study, indicate that HilE, the repressor component of the I1-FFL reported here (I1-FFL<sub>SirA/BarA-HilE-HilD</sub>), is required to reduce the growth cost imposed by the expression of the genes regulated by HilD. Moreover, we and others found that HilE is necessary for successful intestinal colonization by *Salmonella*. Thus, these findings support that I1-FFL<sub>SirA/BarA-HilE-HilD</sub> cooperates to control the precise amount and activity of HilD, for an appropriate balance between the growth cost and the virulence benefit generated by the expression of the genes induced by this regulator. I1-FFL<sub>SirA/BarA-HilE-HilD</sub> represents a complex regulatory I1-FFL that involves multiple regulators acting at

from National Institutes of Health (GM059969) to P.B. J.N.-G. was supported by a master fellowship from CONACYT (429934). The funders had no role in study design, data collection and analysis, decision to publish, or preparation of the manuscript.

**Competing interests:** The authors have declared that no competing interests exist.

distinct levels of gene expression, as well as showing different connections to the rest of the regulatory network governing *Salmonella* virulence.

## Author summary

To infect the intestine of a broad range of hosts, including humans, *Salmonella* is required to express a large number of genes encoding different cellular functions, which imposes a growth penalty. Thus, *Salmonella* has developed complex regulatory mechanisms that control the expression of virulence genes. Here we identified a novel and sophisticated regulatory mechanism that is involved in the fine-tuned control of the expression level and activity of the transcriptional regulator HilD, for the appropriate balance between the growth cost and the virulence benefit generated by the expression of tens of *Salmonella* genes. This mechanism forms an incoherent type-1 feedforward loop (I1-FFL), which involves paradoxical regulation; that is, a regulatory factor exerting simultaneous opposite control (positive and negative) on another factor. I1-FFLs are present in regulatory networks of diverse organisms, from bacteria to humans, and represent a complex biological problem to decipher. Interestingly, the I1-FFL reported here is integrated by ancestral regulators and by regulators that *Salmonella* has acquired during evolution. Thus, our findings reveal a novel I1-FFL of bacteria, which is involved in virulence. Moreover, our results illustrate the integration of ancestral and acquired factors into a regulatory motif, which can lead to the expansion of regulatory networks.

## Introduction

Pathogenic bacteria have developed diverse regulatory mechanisms to control the appropriated spatiotemporal expression of virulence genes. Both activation and repression regulatory mechanisms are essential for bacteria to colonize different niches of hosts.

*Salmonella enterica* serovar Typhimurium (*S. Typhimurium*) contains a large number of virulence genes and a very complex regulatory network that control their expression. Two groups of genes mainly govern *Salmonella* virulence; those located in *Salmonella* Pathogenicity Island 1 (SPI-1) and those located in SPI-2. Both SPI-1 and SPI-2 encode a Type III Secretion System (T3SS), several effector proteins and chaperones, as well as transcriptional regulators [1,2]. The T3SS is a syringe-like multiprotein complex through which bacteria inject effector proteins directly into the cytoplasm of host cells. Effector proteins have distinct biological activities that alter different signal transduction pathways of eukaryotic host cells [3]. The SPI-1 genes mediate *Salmonella* invasion of cells at the intestinal epithelium, which generates enteritis, whereas the SPI-2 genes primarily mediate *Salmonella* replication within host cells [1,2]. Replication/survival inside macrophages within a membrane-bound compartment called the *Salmonella*-containing vacuole (SCV), leads to a systemic infection like typhoid fever [1,2]. Many other *Salmonella* virulence genes are located in distinct genomic regions, with their biological function being related to that of SPI-1 or SPI-2 [2,4,5].

Consistent with their role in intestinal infection, expression of the SPI-1 genes is induced when *Salmonella* resides in the intestinal lumen and in the cytosol of epithelial cells [6,7]. In addition, expression of the SPI-1 genes is regulated by different environmental cues commonly found in the intestine of hosts, such as short- and long-chain fatty acids, bile, oxygen level, osmolarity and pH [8–13]. *In vitro*, these genes are expressed in nutrient-rich media, such as

lysogeny broth (LB), during the late exponential and early stationary growth phases [14–16]. Interestingly, different studies have reported that the SPI-1 genes show a bistable expression both *in vitro* [17–21] and in the gut lumen of mice [22], where only 10–50% of cells from clonal *Salmonella* populations express SPI-1. Moreover, it was shown that the two subpopulations of cells generated by this bistable expression (SPI-1<sup>ON</sup> and SPI-1<sup>OFF</sup>) cooperate for the successful invasion of host cells and intestinal colonization by *Salmonella* [20,21].

Expression of the SPI-1 and related genes is controlled by a very complex regulatory network involving many positive and negative regulators that act at the transcriptional, translational or post-translational level [2,23,24]. The AraC-like regulator HilD, encoded in SPI-1, is the apex of different regulatory cascades through which HilD controls the expression of the SPI-1 genes and many other genes located outside of SPI-1. HilD induces expression of: 1) the SPI-1 genes and other genes located outside of SPI-1, through the HilA, InvF or SprB regulators, encoded in SPI-1 [2,23–26]; 2) the SPI-2 genes and other genes located outside SPI-2, through the SsrA/SsrB two-component system, encoded in SPI-2 [15,27,28]; 3) the flagellar and chemotaxis genes, through the FlhD<sub>4</sub>C<sub>2</sub> transcriptional complex [29,30]; and 4) several other genes located in distinct genomic regions, by direct interaction [26,31,32]. Furthermore, HilD forms a positive feedforward regulatory loop with the AraC-like regulators HilC and RtsA, which recognize the same DNA motif as HilD and form heterodimers with HilD; however, HilD has a dominant function over HilC and RtsA [33–35].

Consistently with its role as a master regulator for *Salmonella* virulence, the expression, concentration and activity of HilD are tightly controlled, representing the central point for regulating SPI-1 genes and many other related genes [2,23,24]. For instance, the Hcp-like protein HilE, encoded in a genomic island other than the SPIs, inhibits HilD activity by protein-protein interaction, thereby affecting homodimerization and DNA binding of HilD [36–38]. In addition, the SirA/BarA two-component system induces expression of *hilD* at the translational level [39]. In this two-component system, SirA and BarA are the response regulator and the sensor kinase, respectively [40–42].

Orthologs of SirA/BarA are present in many other bacteria. In *Escherichia coli* (UvrY/BarA), *Pseudomonas* spp. (GacA/GacS), and *Vibrio cholerae* (VarA/VarS), this system controls expression of numerous genes encoding different cellular activities, including virulence, motility, biofilm formation and metabolism [43,44]. This system has been better characterized in *E. coli* where UvrY/BarA was shown to form a regulatory cascade with the non-translated small RNAs (sRNAs) CsrB and CsrC, and the RNA binding protein CsrA [44,45]. CsrA represses numerous genes at the translational level by interacting with sequences overlapping the ribosome binding sites on target mRNAs [44,45]. In response to its phosphorylation by BarA, UvrY directly activates transcription of CsrB and CsrC, which contain several binding sites for CsrA [44,45]. Thus, CsrB/CsrC sequester CsrA and antagonize its ability to regulate expression of target transcripts [44,45]. Several studies have shown that the counterparts of the UvrY/BarA-CsrB/CsrC-CsrA global regulatory network function similarly in other bacteria [43,44]. For instance, the SirA/BarA system induces expression of the SPI-1 genes through CsrB and CsrC, which antagonize the CsrA-mediated translational repression of the *hilD* transcript [39,46,47].

Interestingly, expression of SPI-1 genes causes growth retardation of *S. Typhimurium* in laboratory conditions. This effect becomes even more pronounced when the SPI-1 genes are overexpressed, such as in the absence of HilE [19]. However, it remains poorly understood how *S. Typhimurium* fine-tunes the expression level of the SPI-1 genes to maintain an appropriate balance between the penalty on growth and the benefit for virulence.

In this study, we report that the SirA/BarA-CsrB/CsrC regulatory cascade induces the expression of *hilE* by counteracting CsrA-mediated translational repression on the *hilE* mRNA, which reveals that SirA/BarA, HilD and HilE form an incoherent type-1 feedforward

loop. Additionally, we demonstrate that HilE is necessary to reduce the growth cost imposed by the expression of genes regulated by HilD, in laboratory conditions and in the intestine of mice. Thus, our results support that the control of HilD expression by the feedforward loop formed by SirA/BarA, HilD and HilE, plays a role in the fitness of *S. Typhimurium* during intestinal infection of hosts.

## Results

### CsrA directly represses the expression of *hilE*

In a current project to analyze the global effect of CsrA on *Salmonella* we obtained circumstantial evidence that CsrA could negatively regulate the expression of *hilE*. To further investigate this phenomenon, we analyzed the chromosomal expression of FLAG-tagged HilE (HilE-FLAG) in the wild-type (WT) *S. Typhimurium* SL1344 strain carrying the pK3-CsrA plasmid expressing CsrA, when grown in conditions that favor the expression of SPI-1 genes (LB medium, at 37°C, with shaking; SPI-1-inducing conditions). Expression of CsrA from pK3-CsrA completely inhibited the amount of HilE-FLAG (Fig 1A). Similar results were obtained by assessing the expression of a *hilE-lacZ* translational fusion (Fig 1B). We were unable to evaluate the expression of HilE-FLAG and *hilE-lacZ* in the absence of CsrA because *csrA* mutants of *S. Typhimurium* exhibit severe growth defects [39,48]. These results indicate that CsrA negatively controls the expression of *hilE*.

To determine whether CsrA regulates *hilE* directly, quantitative electrophoretic mobility shift assays (EMSAs) were performed using purified CsrA and the 5'-end-labelled leader RNA of *hilE*. A band with lower mobility was detected with concentrations of CsrA between 19 and 75 nM, indicating that CsrA formed a complex with the *hilE* transcript; at 150 and 300 nM CsrA a second complex with even lower mobility was also observed (Fig 2A). These data support that CsrA binds two sites on the *hilE* transcript. Nonlinear least-squares analysis of these EMSAs data yielded an apparent  $K_d$  value of  $37 \pm 13$  nM CsrA for *hilE* mRNA. The specificity of the CsrA-*hilE* RNA interaction was evaluated by performing competition experiments with specific (*hilE*) and non-specific (*phoB*) unlabeled RNA competitors. Whereas unlabeled *hilE* RNA was an effective competitor, *phoB* RNA was not (Fig 2B). In agreement with these results, data from a previous global analysis by CLIP-seq showed that CsrA binds *in vivo* to a sequence located near the translation start codon of the *hilE* mRNA [49]. Thus, we conclude that CsrA binds specifically to the *hilE* leader transcript. Together, our results indicate that CsrA directly represses the expression of *hilE*.

### SirA/BarA induces the expression of *hilE* through CsrB/C

CsrA-mediated repression of target genes is counteracted by the two-component system SirA (UvrY)/BarA through the sRNAs CsrB and CsrC, which bind and sequester CsrA [44,45]. To define the complete regulatory cascade involving CsrA that controls the expression of *hilE*, the expression of HilE-FLAG and that of the *lacZ-hilE* fusion was monitored in the WT *S. Typhimurium* strain and its  $\Delta sirA$ ,  $\Delta csrB$ ,  $\Delta csrC$  and  $\Delta csrB \Delta csrC$  derivative mutants, grown in SPI-1-inducing conditions. Both the amount of HilE-FLAG and the expression of *hilE-lacZ* were reduced in the  $\Delta sirA$  mutant, as well as in the  $\Delta csrB \Delta csrC$  double mutant, compared with the WT strain (Fig 3A and 3B). Additionally, as shown in Fig 3B, activity of the *hilE-lacZ* fusion was reduced in the  $\Delta barA$  mutant lacking BarA, the cognate sensor kinase of the SirA response regulator [41,42]. In contrast, the  $\Delta csrB$  and  $\Delta csrC$  single mutants showed WT levels of HilE-FLAG and *hilE-lacZ* expression (Fig 3A and 3B), which is consistent with previous reports indicating that in *S. Typhimurium*, the absence of both CsrB and CsrC is required for observable effects on the expression of other target genes of the SirA/BarA-Csr cascade [39,50]. As

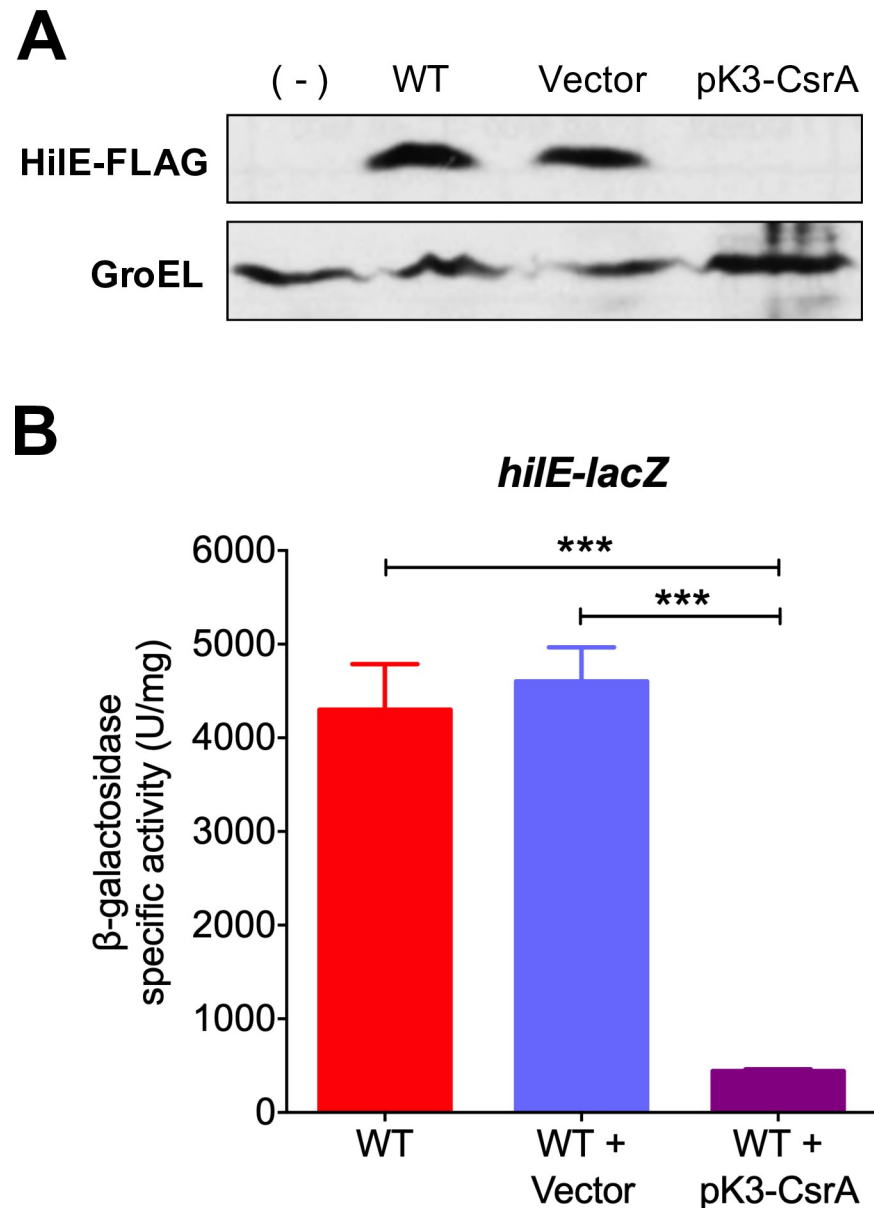

**Fig 1. CsrA represses expression of *hilE*.** (A) HilE-FLAG levels in the WT *S. Typhimurium* strain carrying a chromosomal FLAG-tagged *hilE* gene in the absence or presence of pMPPM-K3 vector or the pK3-CsrA plasmid, which expresses CsrA from a constitutive promoter, were analyzed by Western blotting using monoclonal anti-FLAG antibodies. As a control for protein loading, the expression of GroEL was also determined using polyclonal anti-GroEL antibodies. A WT *S. Typhimurium* strain without the FLAG-tagged *hilE* gene was used as negative control (-). (B)  $\beta$ -galactosidase activity of the translational *hilE-lacZ* fusion contained in the *philE-lacZ* plasmid was determined in the WT *S. Typhimurium* strain in the absence or presence of pMPPM-K3 vector or the pK3-CsrA plasmid. Data represent the average of three independent experiments done in duplicate. Error bars denote the standard deviations. Statistically different values are indicated (\*\*\*,  $p$ -value < 0.0001). Western blot and  $\beta$ -galactosidase assays were performed with samples taken from bacterial cultures grown in LB at 37°C.

<https://doi.org/10.1371/journal.ppat.1009630.g001>

expected, complementation of the  $\Delta$ *sirA* mutant with the pK3-SirA plasmid expressing SirA, restored the activity of the *hilE-lacZ* fusion to levels even slightly higher than those of the WT strain (Fig 3C). Moreover, complementation of the  $\Delta$ *sirA* mutant with the pK3-CsrB plasmid expressing CsrB, also restored the activity of the *hilE-lacZ* fusion (Fig 3C). Collectively, these

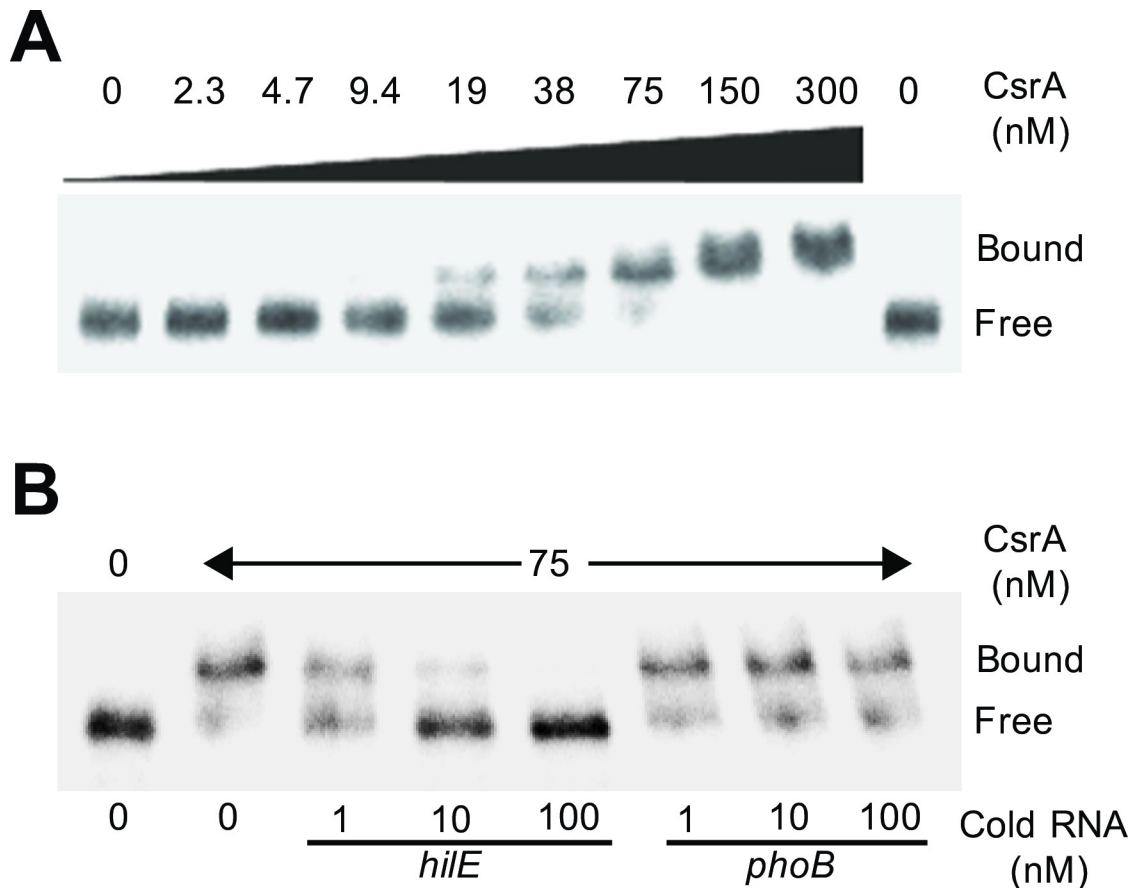

**Fig 2. CsrA specifically interacts with the leader region of the *hilE* transcript.** (A) CsrA binding to the *hilE* RNA was analyzed using EMSAs by incubating labeled *hilE* RNA (0.2 nM) with increasing concentrations of purified CsrA (0, 2.3, 4.7, 9.4, 19, 38, 75, 150 and 300 nM). Positions of bound and free RNA are marked. These experiments were performed three times and a representative gel is shown. (B) RNA competition experiment where labeled *hilE* RNA (0.2 nM) was combined with 1, 10 and 100 nM of unlabeled specific (*hilE*) or non-specific (*phoB*) competitor RNA and incubated with 0 and 75 nM of purified CsrA. Positions of bound and free RNA are marked. A representative gel from two independent assays is shown.

<https://doi.org/10.1371/journal.ppat.1009630.g002>

results indicate that the SirA/BarA two-component system induces the expression of *hilE* through the sRNAs CsrB and CsrC, which counteract repression of this gene by CsrA.

### HilE represses HilD-mediated expression of SPI-1, SPI-2 and SPI-5 genes

HilE negatively affects the activity of the transcriptional regulator HilD [36–38]. Consequently, HilE would decrease the expression of the large number of genes controlled by HilD. To further investigate this repressor role of HilE, we quantified the expression of two genes each from SPI-1 (*hilA* and *invF*), SPI-2 (*ssrAB* and *ssaG*) and SPI-5 (*sopB* and *pipB*), as *cat* transcriptional fusions. HilD positively regulates the expression of all of these genes directly or indirectly [15,23,27,33,51–53]. Experiments were performed in the WT *S. Typhimurium* strain and its  $\Delta$ *hilE* derivative mutant grown in SPI-1-inducing conditions. As shown in Fig 4A, the expression of every gene increased significantly in the  $\Delta$ *hilE* mutant compared with the WT strain. As expected, due to the absence of HilD, only low expression level was observed for these genes in the  $\Delta$ *hilD* and  $\Delta$ *hilE*  $\Delta$ *hilD* mutants (Fig 4A). Consistent with our results, previous studies also indicate that the expression of *hilA* increases in the absence of HilE [36,54]. Additionally, we examined and compared the expression level of the *hilA-cat* fusion in the WT



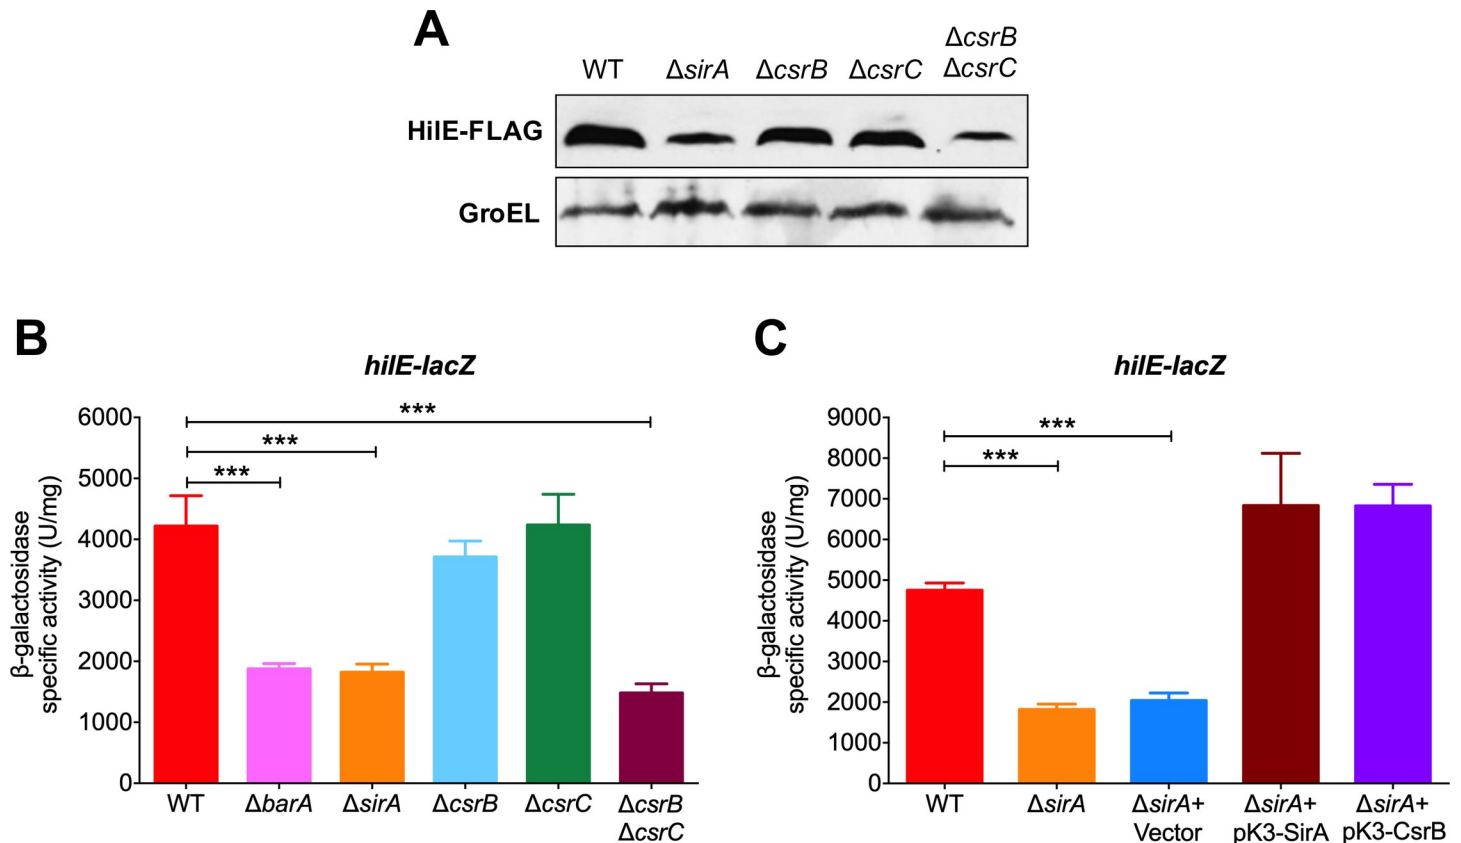

**Fig 3. SirA/BarA and CsrB/CsrC positively regulate the expression of *hilE*.** (A) Western blot analysis of HilE-FLAG expression in the WT *S. Typhimurium* strain and its derivative  $\Delta sirA$ ,  $\Delta csrB$ ,  $\Delta csrC$  and  $\Delta csrB \Delta csrC$  mutants carrying a chromosomal FLAG-tagged *hilE* gene, using monoclonal anti-FLAG antibodies. As a protein loading control, the expression of GroEL was also determined using polyclonal anti-GroEL antibodies. (B)  $\beta$ -galactosidase activity of the translational *hilE-lacZ* fusion contained in the *phlE-lacZ* plasmid was determined in the WT *S. Typhimurium* strain and its derivative  $\Delta barA$ ,  $\Delta sirA$ ,  $\Delta csrB$ ,  $\Delta csrC$  and  $\Delta csrB \Delta csrC$  mutants. (C)  $\beta$ -galactosidase activity of the translational *hilE-lacZ* fusion contained in the *phlE-lacZ* plasmid was determined in the WT *S. Typhimurium* strain and its derivative  $\Delta sirA$  mutant in the absence or presence of pMPM-K3 vector, pK3-SirA or pK3-CsrB plasmids, which express SirA and CsrB, respectively, from a constitutive promoter. Data represent the average of three independent experiments done in duplicate. Error bars symbolize the standard deviations. Statistically different values are indicated (\*\*\*,  $p$ -value < 0.0001). Western blot and  $\beta$ -galactosidase assays were performed with samples taken from bacterial cultures grown in LB at 37°C.

<https://doi.org/10.1371/journal.ppat.1009630.g003>

*S. Typhimurium* strain and its  $\Delta hilE$ , *sirA::Tn10d* (transposon insertion in *sirA*) and  $\Delta hilE sirA::Tn10d$  derivative mutants in the absence or presence of the pK3-SirA plasmid expressing SirA, the pMPM-K3/K6 vector, or the pK6-HilE plasmid expressing HilE. In agreement with previous studies indicating that SirA positively regulates SPI-1 genes [39,40,42,55], the *hila-cat* fusion showed reduced expression levels in the *sirA::Tn10d* mutant containing the pMPM-K3 vector, with respect to the WT strain (Fig 4B). Surprisingly, the *hila-cat* fusion was expressed in the  $\Delta hilE sirA::Tn10d$  double mutant containing the pMPM-K3 vector at a level only slightly lower than in the WT strain (Fig 4B), revealing that in the absence of HilE, *hila* is expressed independently of SirA. It is important to consider that the HilE expression is positively controlled by SirA (this study) but also by other regulators [56–59] as discussed later. In fact, our results show that a partial amount of HilE is present in the absence of SirA (Fig 3). Thus, our results suggest that in the absence of SirA the expression of *hila* is repressed by two mechanisms: 1) CsrA inhibits translation of the *hilD* mRNA and 2) the diminished amount of HilE is able to inactivate background levels of HilD, which would avoid the positive autoregulation of HilD. It is reasonable to suggest that when SirA counteracts the CsrA-mediated

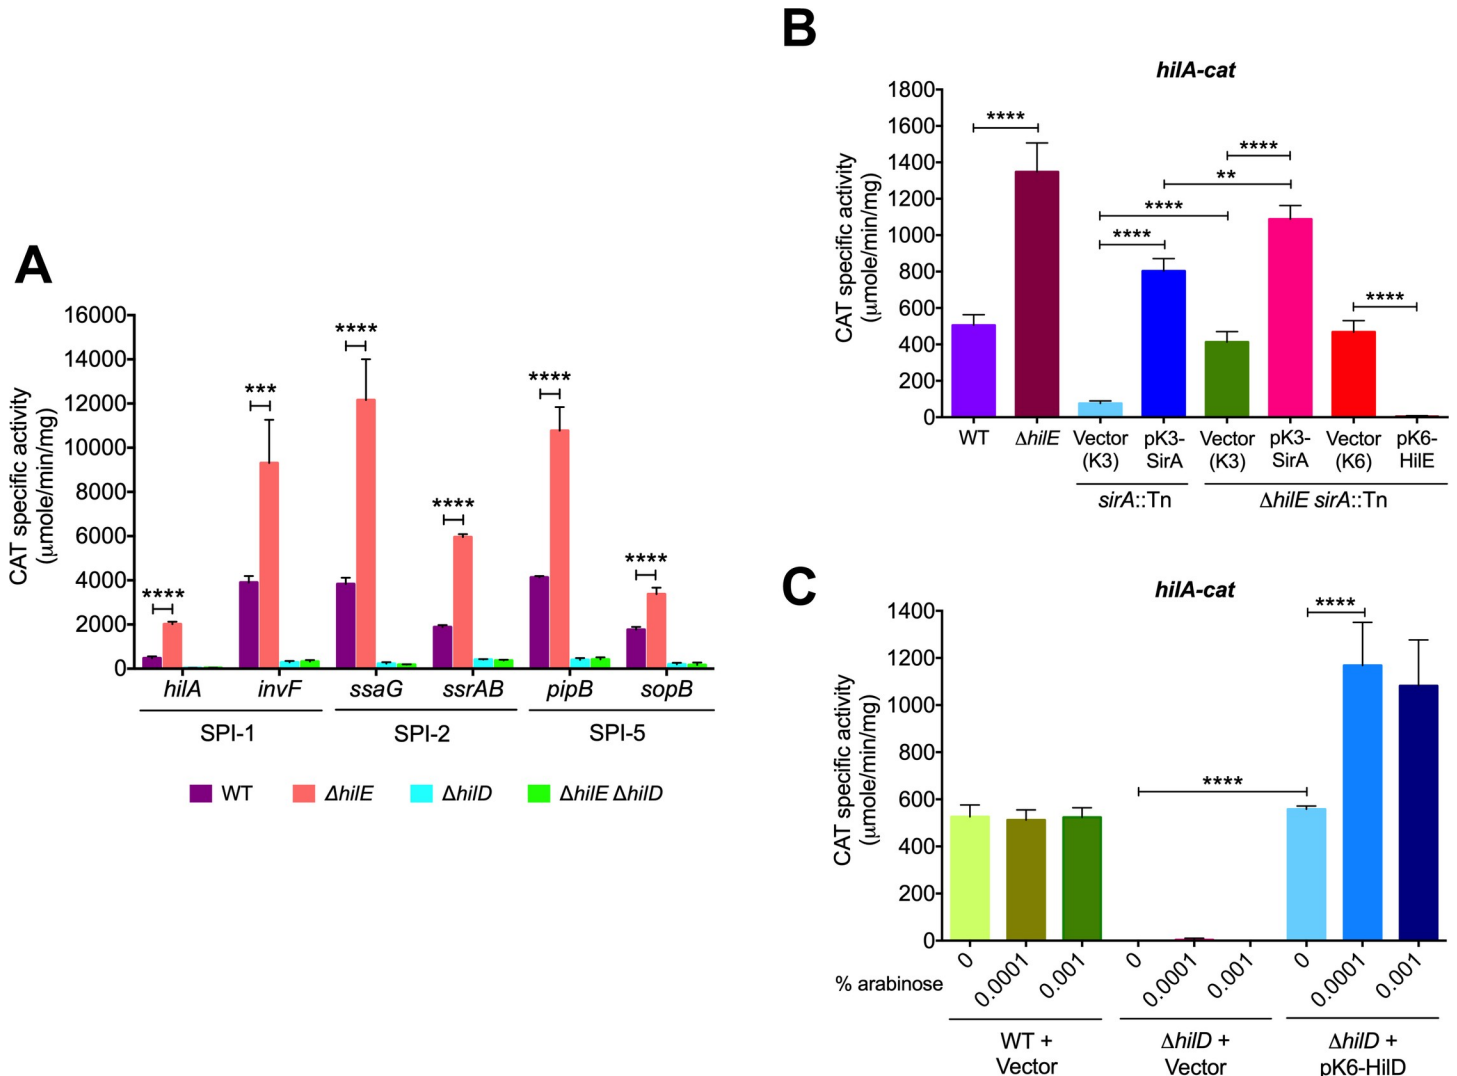

**Fig 4. HilE represses the expression of genes regulated by HilD.** (A) CAT activity of the *hilA-cat*, *invF-cat*, *ssaG-cat*, *ssrAB-cat*, *pipB-cat* and *sopB-cat* transcriptional fusions, contained in plasmids *philA-cat*, *pinvF-cat*, *pssaG-cat*, *pssrAB-cat*, *ppipB-cat* and *psopB-cat*, respectively, was determined in the WT *S. Typhimurium* strain and its derivative  $\Delta hilE$ ,  $\Delta hilD$  and  $\Delta hilE \Delta hilD$  mutants. (B) CAT activity of the *hilA-cat* transcriptional fusion, contained in the *philA-cat* plasmid, was determined in the WT *S. Typhimurium* strain and its derivative  $\Delta hilE$ , *sirA::Tn10d* and  $\Delta hilE sirA::Tn10d$  mutants in the absence or presence of pMPM-K3 or pMPM-K6 vectors, the pK3-SirA plasmid expressing SirA from a constitutive promoter or the pK6-HilE plasmid expressing HilE from an arabinose-inducible promoter. Expression of HilE from pK6-HilE was induced by adding 0.001% L-arabinose to the medium. (C) CAT activity of the *hilA-cat* transcriptional fusion, contained in the *philA-cat* plasmid, was determined in the WT *S. Typhimurium* strain and its derivative  $\Delta hilD$  mutant carrying the pMPM-K6 vector or the pK6-HilD plasmid, which expresses HilD from an arabinose-inducible promoter. Expression of HilD from pK6-HilD was induced with 0%, 0.0001% or 0.001% L-arabinose. CAT-specific activity was obtained from samples collected from bacterial cultures grown in LB at 37°C. Data represent the average of three independent experiments done in duplicate. Error bars indicate the standard deviations. Statistically different values are indicated (\*\*, *p*-value < 0.01; \*\*\*, *p*-value < 0.001; \*\*\*\*, *p*-value < 0.0001).

<https://doi.org/10.1371/journal.ppat.1009630.g004>

repression of *hilD*, higher levels of HilE would be required to negatively control the activity of HilD, which can be reached with the positive regulation of the *hilE* expression by SirA.

The presence of the pK3-SirA plasmid further increased the expression of *hilA-cat* in the  $\Delta hilE sirA::Tn10d$  mutant and, as could be expected, the presence of the pK6-HilE plasmid completely inhibited the expression of *hilA-cat* in the  $\Delta hilE sirA::Tn10d$  mutant (Fig 4B). To note, the *hilA-cat* fusion showed similar expression levels in the  $\Delta hilE$  and  $\Delta hilE sirA::Tn10d$  + pK3-SirA mutants, as well as in the  $\Delta hilD$  mutant complemented with the pK6-HilD plasmid



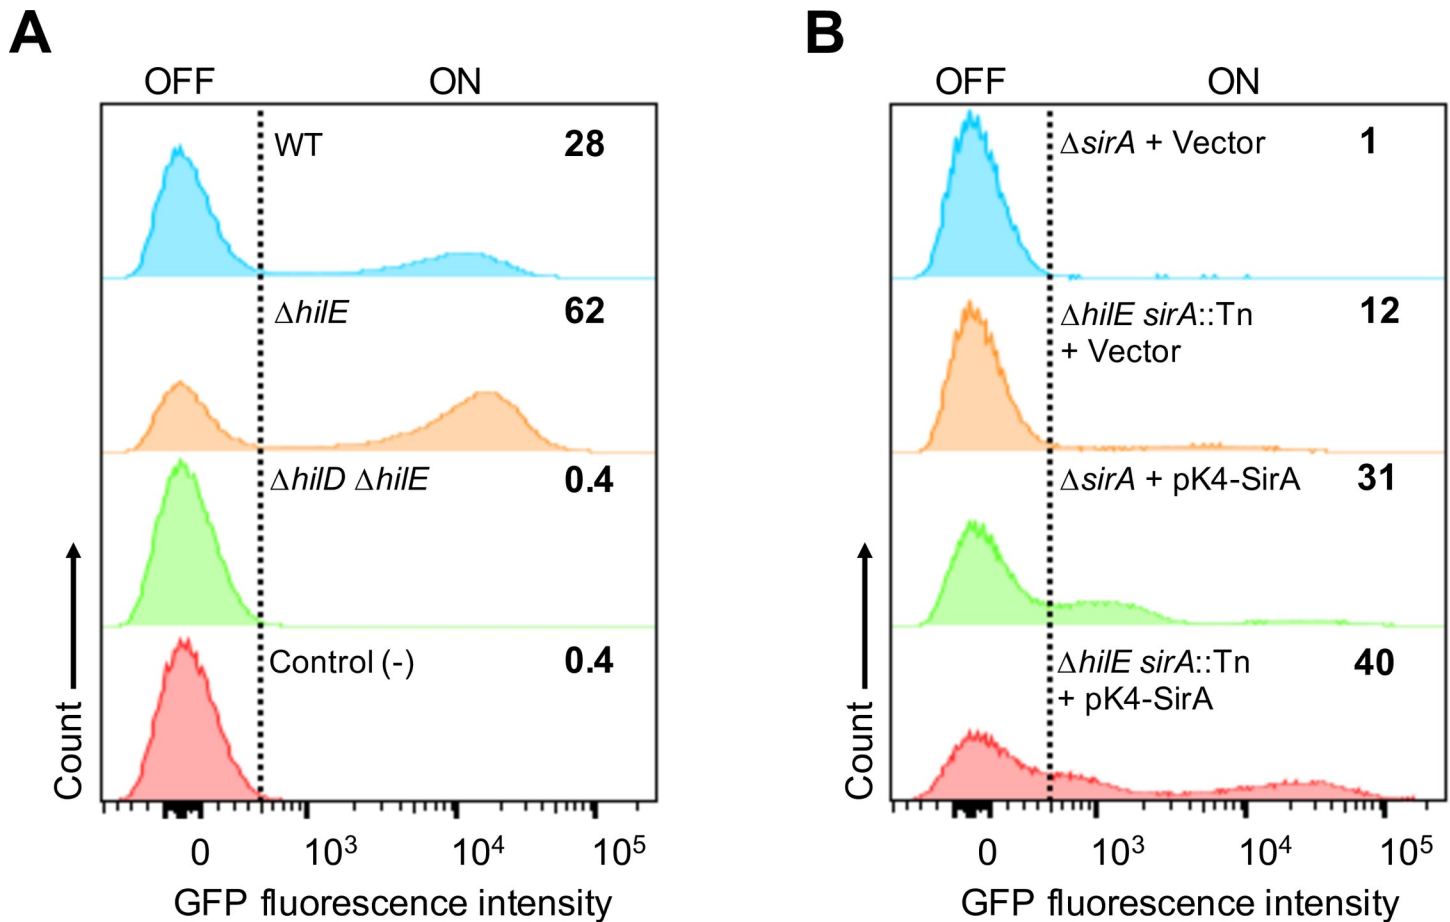

**Fig 5. HilE negatively controls the bistable expression of SPI-1.** Flow cytometry analysis of GFP fluorescence expression of the *invF-gfp* transcriptional fusion contained in the low copy pMPMA3 $\Delta$ Plac *PinvF-gfp*[LVA]/R plasmid in different *S. Typhimurium* strains. (A) GFP expression in cultures of the WT strain and its derivative  $\Delta hilE$  and  $\Delta hilE \Delta hilD$  mutants carrying the *invF-gfp* fusion, as well as in cultures of the WT strain carrying the *gfp* reporter gene without a promoter (negative control). (B) GFP expression in cultures of the *sirA::Tn10d* and  $\Delta hilE sirA::Tn10d$  mutants carrying the *invF-gfp* fusion and the pMPM-K4 $\Omega$  vector or the pK4-SirA plasmid expressing SirA. The percentage of the GFP+ population of each strain is indicated on the graphs. Data shown are representative of two independent experiments performed with ten independent bacterial colonies.

<https://doi.org/10.1371/journal.ppat.1009630.g005>

overexpressing HilD (Fig 4B and 4C), which could suggest that in the absence of HilE (or over-expression of HilD) maximal expression levels of *hilA* are reached.

We next aimed to analyze the effect of HilE on the fraction of cells expressing SPI-1 genes in the *Salmonella* population. To do this, GFP fluorescence expression from an *invF-gfp* transcriptional fusion was quantified by flow cytometry in cultures of the WT *S. Typhimurium* strain and its  $\Delta hilE$  and  $\Delta hilE \Delta hilD$  derivative mutants, as well as in cultures of the *sirA::Tn10d* and  $\Delta hilE sirA::Tn10d$  mutants carrying the pK4-SirA plasmid expressing SirA or the pMPM-K4 $\Omega$  vector, grown in SPI-1-inducing conditions. Similar to other reports [17–21], only 28% of the cells from cultures of the WT strain expressed *invF-gfp*, whereas 62% of the cells expressed this fusion in cultures of the  $\Delta hilE$  mutant (Fig 5A). As expected, expression of *invF-gfp* in the  $\Delta hilE \Delta hilD$  mutant or the WT strain carrying the *gfp* reporter gene without a promoter showed nearly undetectable expression of GFP fluorescence (Fig 5A). In addition, the fraction of cells expressing the *invF-gfp* fusion was higher in the  $\Delta hilE sirA::Tn10d$  double mutant than in the *sirA::Tn10d* single mutant, both in the presence of the vector pMPM-K4 $\Omega$  or the pK4-SirA plasmid (Fig 5B). Intriguingly, complementation of the *sirA::Tn10d* and  $\Delta hilE$

*sirA::Tn10d* mutants yielded a subpopulation of cells with an *invF-gfp* expression pattern somewhat different to that of cells from the WT strain and the  $\Delta$ *hilE* mutant (Fig 5A and 5B), which seems to be an effect of the expression of SirA from a multicopy plasmid. Nevertheless, these results clearly show that HilE reduces the fraction of cells expressing SPI-1 genes in the *Salmonella* population.

Collectively, these results reinforce that HilE plays a major role in regulating the SPI-1 genes by acting as a repressor of HilD. It is important to note that the presence of HilE only decreases, but does not eliminate, the HilD-mediated activation of target genes, or the fraction of cells from the *Salmonella* population that expresses these genes, in SPI-1-inducing conditions.

### HilE reduces the deleterious effect on growth caused by expression of genes controlled by HilD

Interestingly, SirA/BarA induces the expression of both HilD [39] and HilE (this study), which would seem counterintuitive. What would be the role of the regulation of *hilE* by SirA/BarA?

Overexpression of HilD or the absence of HilE retard growth of *S. Typhimurium* in competitive assays performed in LB, which was partially attributable to the overexpression of some genes regulated by HilD [19]. To further investigate this phenomenon, we monitored the growth of the WT *S. Typhimurium* strain and the  $\Delta$ *hilE*,  $\Delta$ *hilD* and  $\Delta$ *hilE*  $\Delta$ *hilD* mutants, in mixed cultures grown in SPI-1-inducing conditions. In the WT/ $\Delta$ *hilE* mixed cultures, the WT strain outcompeted the  $\Delta$ *hilE* mutant, representing 80% of the viable cells at the end of these assays (Fig 6A). In contrast, in the WT/ $\Delta$ *hilD* mixed cultures, the WT strain was outcompeted by the  $\Delta$ *hilD* mutant; only 14% of the viable cells at the end of these assays were WT (Fig 6B). These results are in agreement with those obtained previously, showing that the absence of HilE and HilD has negative and positive effects, respectively, on the growth of *S. Typhimurium* cultures [19]. Furthermore, we observed that the WT strain was also outcompeted by the  $\Delta$ *hilE*  $\Delta$ *hilD* mutant to a similar extent as the  $\Delta$ *hilD* single mutant (Fig 6B and 6C), suggesting that the negative effect caused by the absence of HilE on the *S. Typhimurium* growth requires the presence of HilD.

Additionally, we analyzed the competitive growth between the  $\Delta$ *sirA* and  $\Delta$ *hilE* *sirA::Tn10d* mutants carrying the pMPM-K3 vector or the pK3-SirA plasmid expressing SirA. Interestingly, in the presence of the pMPM-K3 vector, the  $\Delta$ *sirA* and  $\Delta$ *hilE* *sirA::Tn10d* mutants grew similarly through the time assessed (Fig 6D). In contrast, in the presence of the pK3-SirA plasmid, the  $\Delta$ *hilE* *sirA::Tn10d* mutant was outcompeted by the  $\Delta$ *sirA* mutant; only 18% of the viable cells at the end of these assays were from the  $\Delta$ *hilE* *sirA::Tn10d* mutant strain (Fig 6E). These results reveal that SirA is required for HilE to play a role in the fitness of *S. Typhimurium*.

Together, these results show that HilE reduces the deleterious effect on the *S. Typhimurium* growth caused by the expression of genes regulated by HilD in laboratory conditions.

SPI-1-inducing conditions are considered to somehow mimic the intestinal environment found by *Salmonella* in hosts. Therefore, on the basis of our results described above, we investigated whether HilE is important for successful intestinal colonization by *S. Typhimurium*. For this analysis, we determined and compared the survival of the WT *S. Typhimurium* strain to that of the  $\Delta$ *hilE*,  $\Delta$ *hilD* and  $\Delta$ *hilE*  $\Delta$ *hilD* mutants, in the intestine of streptomycin-pre-treated mice, a model used to study the intestinal colonization by *S. Typhimurium* [60]. Groups of eight mice were orally infected with a mix of an equal number of cells of the WT strain and each mutant strain. Three days post-infection, bacteria from feces and cecum of mice were counted, and a competitive index was obtained to determine the proportion

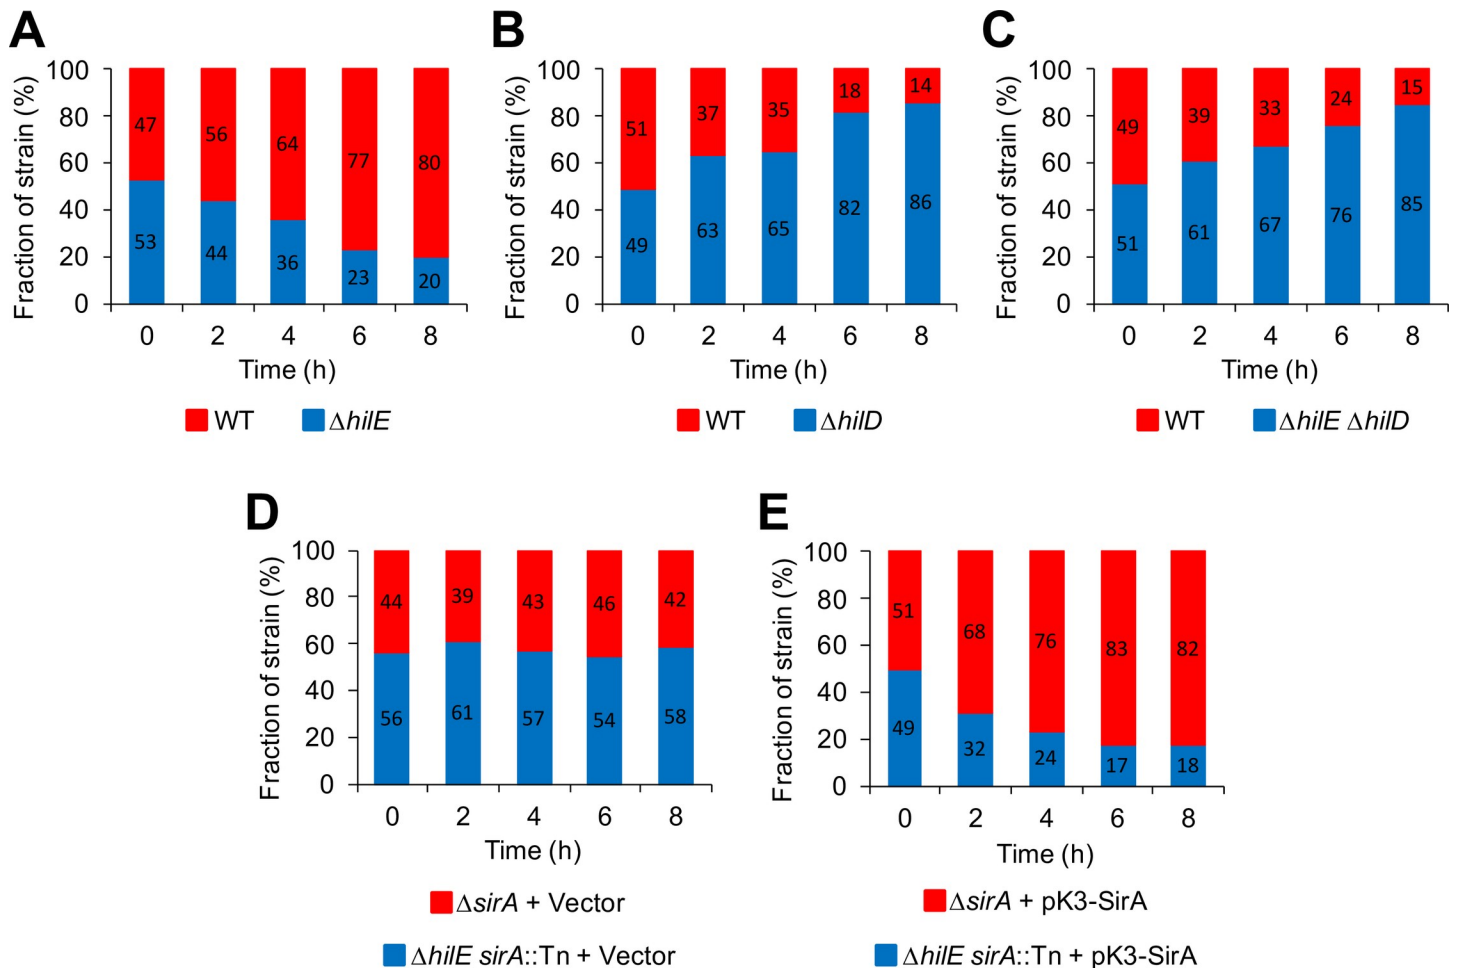

**Fig 6. Detrimental effect on bacterial growth by the expression of genes controlled by HilD.** *In vitro* competitive growth (A) between WT *S. Typhimurium* strain and isogenic  $\Delta hilE$  mutant, (B) between WT *S. Typhimurium* strain and isogenic  $\Delta hilD$  mutant, (C) between WT *S. Typhimurium* strain and isogenic  $\Delta hilE \Delta hilD$  mutant, (D) between the  $\Delta sirA$  and  $\Delta hilE sirA::Tn10d$  mutants carrying the pMPM-K3 vector, and (E) between the  $\Delta sirA$  and  $\Delta hilE sirA::Tn10d$  mutants carrying the pK3-SirA plasmid expressing SirA, was determined by counting CFUs for each strain from samples taken at 0, 2, 4, 6 and 8 h of bacterial mixed cultures grown in LB at 37°C with shaking. CFUs are represented as fraction (percentage) of each strain in the respective mixed culture. Data represent the average of three independent experiments.

<https://doi.org/10.1371/journal.ppat.1009630.g006>

between each mutant and the WT strain. The  $\Delta hilE$  mutant showed a ~30-fold and ~250-fold reduction in survival with respect to the WT strain, in feces and cecum, respectively. In contrast, the survival of the  $\Delta hilD$  and  $\Delta hilE \Delta hilD$  mutants was similar or slightly higher than that of the WT strain in both feces and cecum (Fig 7). Thus, the absence of HilE attenuates the intestinal colonization by *S. Typhimurium* in a HilD-dependent way. These results are in agreement with those from a previous study showing that HilE is important for the intestinal disease caused by long term infections of *S. Typhimurium* in mice (i.e. at 10 days post-infection), including colonization and induction of enteritis [20]. Furthermore, our results are also consistent with reports indicating that SPI-1 or HilD function is required to invade cells from the intestinal epithelium, and thus to induce enteritis, but not to colonize the cecum lumen [2,20,60–62]. Replication of *Salmonella* in the intestinal lumen has been shown to require genes for the use of specific nutrients present in the inflamed intestine, such as the *eut*, *ttr* and *pdu* genes [63–65], which, according to previous transcriptomic analyses, are not regulated by HilD [66]. These data reveal a crucial role for HilE during intestinal infection by *S. Typhimurium*.

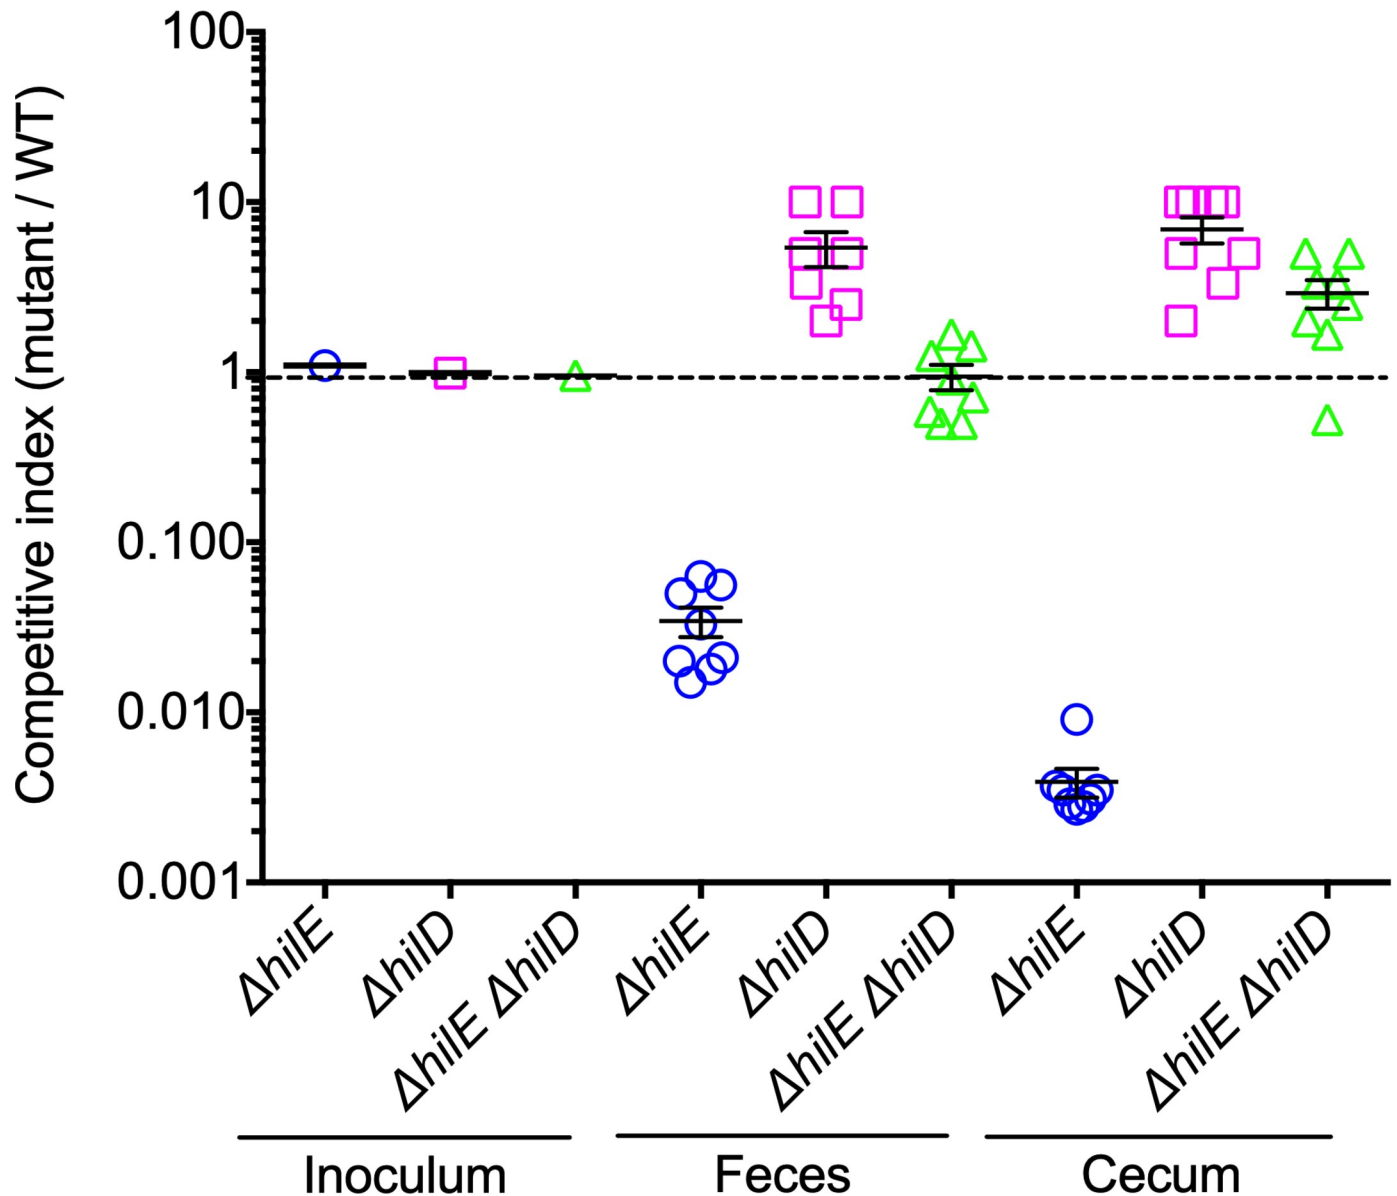

**Fig 7. HilE is required for the intestinal colonization of mice by *S. Typhimurium*.** Groups of eight streptomycin-pretreated mice were orally inoculated with a mixed bacterial suspension containing an equal amount of CFUs ( $0.5 \times 10^9$ ) of the WT *S. Typhimurium* strain and the respective mutant (WT +  $\Delta$ *hilE*, WT +  $\Delta$ *hilD* or WT +  $\Delta$ *hilE*  $\Delta$ *hilD*). At 3 days post-infection, CFUs from feces and cecum were counted for each strain and a Competitive Index (CI; CFUs mutant / CFUs WT) was obtained. A CI of 1.0, represented by a horizontal dotted line, indicates that the two strains (WT and mutant) were present in equivalent numbers.

<https://doi.org/10.1371/journal.ppat.1009630.g007>

In all, together with previous reports, our data suggest that by inducing the expression of HilD and its negative regulator HilE, SirA/BarA exerts a fine-tuning regulatory control that cooperates to lessen the growth penalty produced by HilD-mediated expression of several tens of virulence factors, which is required for the successful intestinal colonization by *S. Typhimurium*.

## Discussion

Regulatory networks are built up by recurring patterns of interactions between regulatory factors that are designed as network motifs, which are present in diverse organisms including bacteria, yeast, plants, animals, and humans [67,68]. One family of network motifs is the feed-forward loop (FFL), where a factor X regulates factors Y and Z, and Y regulates Z. As the three regulatory interactions between X, Y, and Z can be either positive or negative, eight structural types of FFLs are possible [68,69]. One FFL commonly present in the best-studied transcriptional networks, those from *E. coli* and yeast, is the incoherent type-1 FFL (I1-FFL), where a factor X positively regulates factors Y and Z, while Y negatively regulates Z. Thus, X exerts an “incoherent” (or “paradoxical”) regulation on Z through two opposite effects [69,70] (Fig 8A), which represents a complex biological problem to decipher.

Our results from this study reveal a novel I1-FFL involved in gene expression in bacteria. We previously determined that in *S. Typhimurium*, the SirA/BarA two-component system induces the expression of the transcriptional regulator HilD, through the sRNAs CsrB and CsrC, which counteracts the CsrA-mediated repression of *hilD* translation [39]. HilD induces the expression of a large number of *Salmonella* virulence genes [2,15,26,29,31,32,66]. In this work, we show that the SirA/BarA/Csr system also regulates expression of HilE by a similar way. HilE negatively controls HilD activity by protein-protein interaction [36–38]. It is important to note that HilD is the only known target of HilE. Hence, the SirA/BarA-CsrB/C cascade exerts two opposite regulatory effects on HilD; the activation of the *hilD* mRNA translation, and the inhibition of HilD activity through HilE, thus constituting an I1-FFL (I1-FFL<sub>SirA/BarA-HilE-HilD</sub>) that involves regulation at the transcriptional, translational and post-translational levels (Fig 8B).

I1-FFLs can influence fold-change detection [71], adaptive tuning [72], response time [69,70] and response amplitude of gene expression [73]. Our results and those from a previous study [19] show that in the absence of HilE, the repressor factor of I1-FFL<sub>SirA/BarA-HilE-HilD</sub> (Fig 8B), the growth of *S. Typhimurium* is slowed down in laboratory conditions, which can be attributed to the overexpression of genes regulated by HilD that has a deleterious effect by a still unknown mechanism. We found that the absence of HilE negatively affects the *S. Typhimurium* growth only in the presence of SirA and HilD, the two other components of I1-FFL<sub>SirA/BarA-HilE-HilD</sub>. Additionally, our results and a prior report [20] indicate that the SPI-1 genes are expressed *in vitro* in a bistable fashion that involves a control by HilE. In the presence of HilE only about one third fraction of the *S. Typhimurium* population expresses SPI-1, while in the absence of HilE the fraction of cells expressing SPI-1 increases more than twofold. Moreover, our results and those reported previously [20] indicate that the absence of HilE attenuates the intestinal colonization by *S. Typhimurium*, an effect also mediated through HilD. Interestingly, in the intestine of mice, the SPI-1 genes are also expressed in a bistable fashion, and in the absence of HilE, the proportion of *S. Typhimurium* cells expressing SPI-1 increases, imposing a growth pressure that leads to the selection of avirulent *hilD* mutants [20]. Furthermore, the lack of HilE increases the invasion of *S. Typhimurium* into epithelial culture cells by 2-5-fold [36,54]. Altogether, these findings suggest that I1-FFL<sub>SirA/BarA-HilE-HilD</sub> is involved, together with other regulatory pathways, in the control of the precise amount and activity of HilD, resulting in an appropriate balance between the growth cost and the virulence benefit generated by the expression of the genes induced by this regulator (Fig 8B).

The SirA/BarA system seems to be directly activated by short-chain fatty acids such as acetate and formate, which are known to induce the expression of SPI-1 genes [8,74–76]. Therefore, these molecules commonly present in the mammalian intestines, probably in conjunction with other environmental cues, are expected to turn on I1-FFL<sub>SirA/BarA-HilE-HilD</sub>.

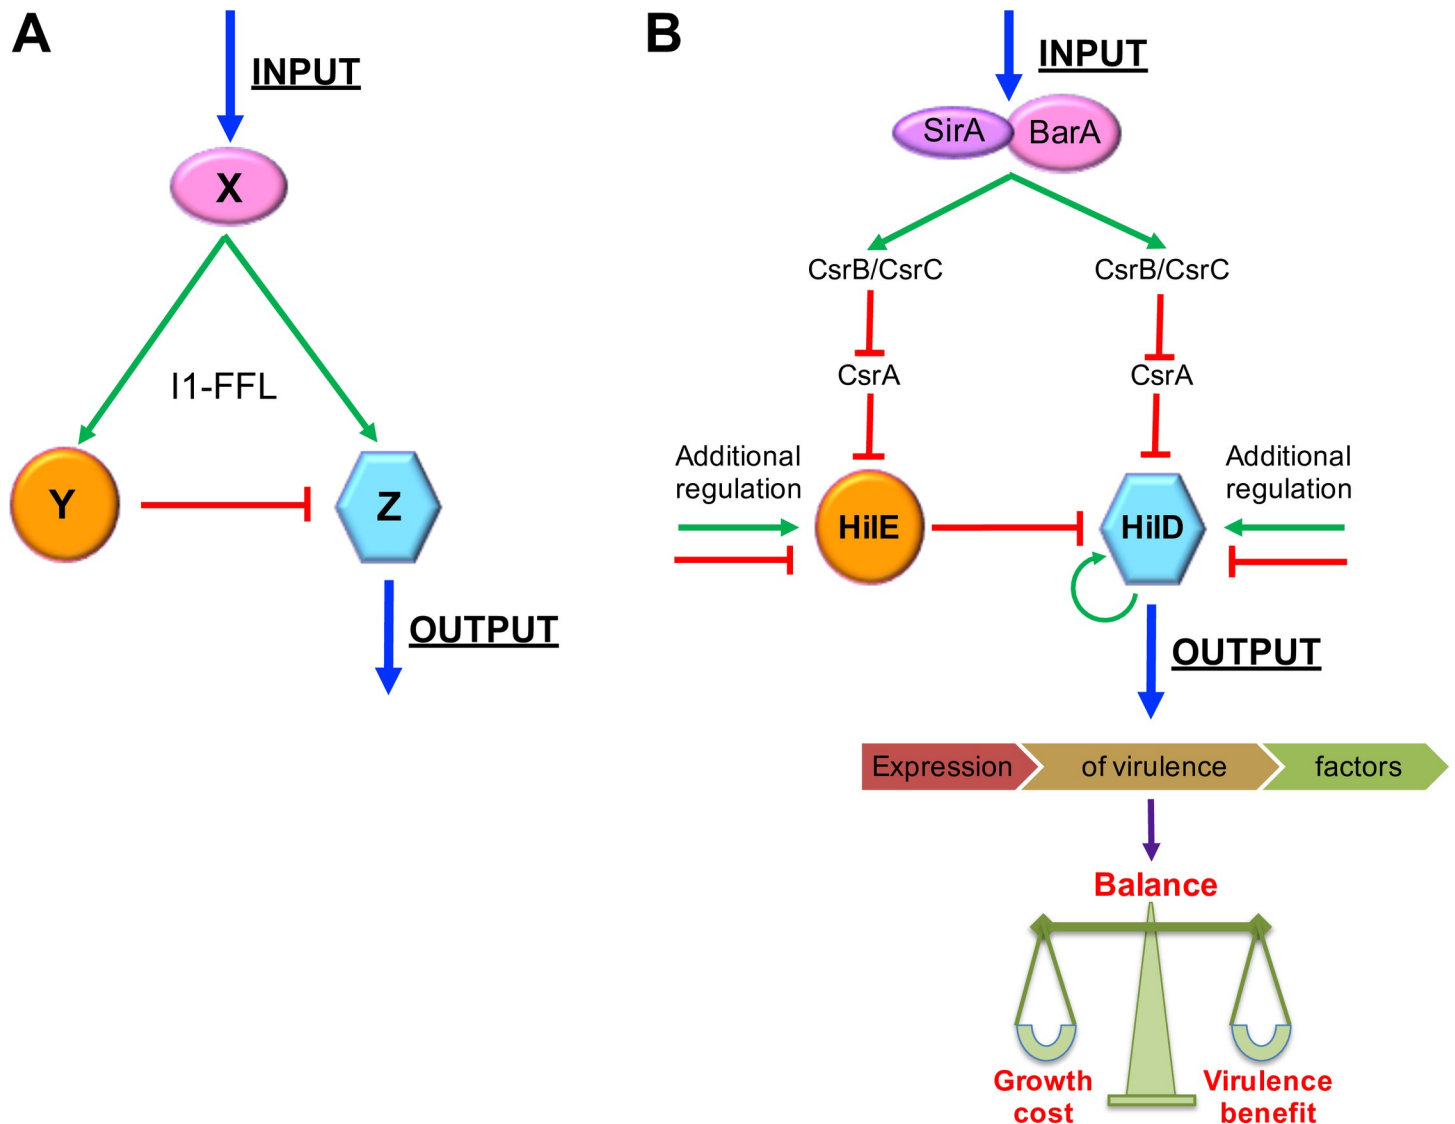

**Fig 8. Structure and role of I1-FFL<sub>SirA/BarA-HilE-HilD</sub> in *Salmonella* virulence.** (A) Structure of the incoherent type-1 feedforward loop (I1-FFL) network motif, where the factor X activates factors Z and Y, and Y represses Z; thus, X exerts opposite controls on Z. (B) Structure and function of I1-FFL<sub>SirA/BarA-HilE-HilD</sub>. Molecules present in the mammalian intestines, such as short-chain fatty acids, have been shown to activate the SirA/BarA two-component system. SirA/BarA induces expression of both HilD and HilE, through the sRNAs CsrB and CsrC, which bind to CsrA and thus counteract CsrA-mediated repression on the *hilD* and *hilE* transcripts. HilE inhibits activity of HilD by protein-protein interaction. Therefore, SirA/BarA simultaneously exerts positive and negative control on HilD, which cooperates for the appropriate balance between the growth cost and the virulence benefit generated by the expression of tens of virulence genes regulated by HilD. Additional positive and negative regulation on HilD and HilE also would control the expression level of the genes regulated by HilD. See text for more details. Green arrows and red blunt-end lines indicate positive and negative control, respectively.

<https://doi.org/10.1371/journal.ppat.1009630.g008>

However, several other positive and negative regulatory mechanisms acting on HilD or HilE provide additional inputs to I1-FFL<sub>SirA/BarA-HilE-HilD</sub> for fine tuning the expression level of the genes regulated by HilD (Fig 8B). Expression of HilD is controlled positively by transcriptional autoregulation, directly or through the feedforward loop that HilD forms with HilC and RtsA [32–34,77,78]. HilD is also controlled by Hfq, ArcA, LoiA, Fis and Hu at the transcriptional initiation level [79–82], by Gre factors acting during transcriptional elongation [83], as well as by Fur and FliZ acting at the transcriptional/post-translational and post-translational levels, respectively [84,85]. Whereas the expression or amount of HilD is controlled negatively by



H-NS, IscR, SsrB/SsrA and PhoP/PhoQ at the transcriptional level [79,86–89], by StdE/StdF at the post-transcriptional level [90], by FnrS and ArcZ at the translational level [13], by CRP-cAMP at the post-translational level [91], as well as by the Lon protease and CpxR/CpxA that decrease the stability of HilD [78,92]. Additionally, controversial reports indicate that the acetyltransferase enzyme Pat decreases or increases the stability and controls the DNA-binding activity of HilD [93–95]. On another hand, expression of HilE is controlled positively by FimYZ, PhoP/PhoQ, PhoB/PhoR and LeuO at the transcriptional level [56–59], whereas it is controlled negatively by MIC and IsrM at the transcriptional and translational levels, respectively [96]. Thus, the three main components of I1-FFL<sub>SirA/BarA-HilE-HilD</sub> could connect in a dynamic way to this regulatory motif with the rest of the regulatory network controlling physiology and virulence in *Salmonella*.

Only a few I1-FFLs that control gene expression have been well-defined experimentally in bacteria. One of the best characterized is that involved in galactose metabolism in *E. coli*, where CRP-cAMP controls the expression of the *gal* and *mgl* genes by two opposite pathways, via direct positive regulation and negative regulation through GalS [70,73]. Additionally, in *Pseudomonas aeruginosa*, a quorum sensing system controlling virulence-related phenotypes is constituted by an I1-FFL, where LasR activates the expression of LasI, as well as that of RsaL, which in turn represses expression of LasI [97]. Furthermore, also in *P. aeruginosa*, the alternative sigma factor  $\sigma^{22}$  activates the expression of the virulence-associated enzyme AlgC, as well as that of the sRNA ErsA that represses translation of *algC* [98]. In addition, in *Rhodobacter sphaeroides*, two I1-FFLs are involved in the expression of photosynthesis-related genes. In one case, MppG exerts opposite transcriptional regulation on these genes, direct activation and indirect repression through AppA and PpsR, respectively [99], whereas in the other case, PrrA directly activates transcription of these genes but also represses their translation through the sRNA PcrZ [100,101]. Finally, in *S. Typhimurium*, the PhoP/PhoQ two-component system activates the expression of *mgtC*, encoding a virulence-associated protein, and that of the sRNA AmgR, while AmgR destabilizes *mgtC* mRNA [102], which also constitutes an I1-FFL.

Our study reveals a novel function for an I1-FFL, that is, fine tuning regulation to reduce the growth cost imposed by simultaneous expression of a high number of virulence genes. Our results and those from a previous study [20] provide evidence indicating that I1-FFL<sub>SirA/BarA-HilE-HilD</sub> is necessary for intestinal colonization by *Salmonella*. Moreover, our findings illustrate the integration of ancestral (e.g. SirA/BarA) and acquired regulators (e.g. HilD and HilE) into a specific regulatory motif, which can lead to the expansion of regulatory networks during evolution.

## Materials and methods

### Ethics statement

Animal experiments were conducted according to the standard operating protocols approved by the International Committee for Animal Care and Use from CICUAL-UNAM and by the Official Mexican Norm NOM-062-Z00-1999.

### Bacterial strains, media and culture conditions

Bacterial strains used in this work are listed in Table 1. Bacterial cultures for  $\beta$ -galactosidase, chloramphenicol acetyltransferase and Western blot assays were grown in 250-ml flasks containing 50 ml of lysogeny broth (LB)-Miller, which were incubated at 37°C with shaking up to reach an O.D.<sub>600nm</sub> of 1.4 (5–8 h). Bacterial cultures for flow cytometry assays were grown in 16 x 150 mm glass tubes containing 5 ml of LB-Miller, which were incubated at 37°C with shaking up to reach an O.D.<sub>600nm</sub> of 1.2 (12–18 h). When necessary, culture medium was supplemented with ampicillin (200  $\mu$ g/ml), streptomycin (100  $\mu$ g/ml) or kanamycin (30  $\mu$ g/ml).

Table 1. Bacterial strains and plasmids used in this study.

| Strain or plasmid                                      | Genotype or description                                                                                                                                     | Source or reference |
|--------------------------------------------------------|-------------------------------------------------------------------------------------------------------------------------------------------------------------|---------------------|
| <b>Strain</b>                                          |                                                                                                                                                             |                     |
| <i>Salmonella</i> Typhimurium                          |                                                                                                                                                             |                     |
| SL1344                                                 | Wild type; <i>xyl</i> , <i>hisG</i> , <i>rpsL</i> ; Sm <sup>R</sup>                                                                                         | [114]               |
| 14028s                                                 | Wild type                                                                                                                                                   | ATCC                |
| JPTM5                                                  | $\Delta$ <i>hilD</i> :: <i>kan</i>                                                                                                                          | [15]                |
| JPTM23                                                 | $\Delta$ <i>sirA</i> :: <i>kan</i>                                                                                                                          | [39]                |
| JPTM27                                                 | $\Delta$ <i>sirA</i>                                                                                                                                        | [39]                |
| JPTM39                                                 | $\Delta$ <i>barA</i> :: <i>kan</i>                                                                                                                          | [39]                |
| JPTM40                                                 | $\Delta$ <i>csrB</i> :: <i>kan</i>                                                                                                                          | [39]                |
| JPTM41                                                 | $\Delta$ <i>csrC</i> :: <i>kan</i>                                                                                                                          | [39]                |
| JPTM42                                                 | $\Delta$ <i>csrB</i>                                                                                                                                        | [39]                |
| JPTM43                                                 | $\Delta$ <i>csrB</i> $\Delta$ <i>csrC</i> :: <i>kan</i>                                                                                                     | [39]                |
| DTM56                                                  | 14028s $\Delta$ <i>hilE</i> :: <i>kan</i>                                                                                                                   | [78]                |
| DTM133                                                 | $\Delta$ <i>csrC</i>                                                                                                                                        | This study          |
| DTM134                                                 | $\Delta$ <i>csrB</i> $\Delta$ <i>csrC</i>                                                                                                                   | This study          |
| DTM135                                                 | $\Delta$ <i>hilE</i> :: <i>kan</i>                                                                                                                          | This study          |
| DTM136                                                 | $\Delta$ <i>hilE</i>                                                                                                                                        | This study          |
| DTM137                                                 | $\Delta$ <i>hilE</i> $\Delta$ <i>hilD</i> :: <i>kan</i>                                                                                                     | This study          |
| DTM138                                                 | 14028s <i>hilE</i> ::3XFLAG- <i>kan</i>                                                                                                                     | This study          |
| DTM139                                                 | 14028s <i>hilE</i> ::3XFLAG                                                                                                                                 | This study          |
| CJ035                                                  | <i>sirA</i> ::Tn10d                                                                                                                                         | [40]                |
| DTM140                                                 | <i>sirA</i> ::Tn10d                                                                                                                                         | This study          |
| DTM141                                                 | $\Delta$ <i>hilE</i> <i>sirA</i> ::Tn10d                                                                                                                    | This study          |
| <i>Escherichia coli</i>                                |                                                                                                                                                             |                     |
| DH10 $\beta$                                           | Laboratory strain                                                                                                                                           | (Invitrogen)        |
| <b>Plasmids</b>                                        |                                                                                                                                                             |                     |
| pKK232-8                                               | pBR322 ori vector containing a promoterless chloramphenicol acetyltransferase ( <i>cat</i> ) gene, Ap <sup>R</sup>                                          | [115]               |
| philA-cat                                              | pKK232-8 derivative containing a <i>hilA</i> - <i>cat</i> transcriptional fusion from nucleotides -410 to +446                                              | [15]                |
| pinvF-cat                                              | pKK232-8 derivative containing an <i>invF</i> - <i>cat</i> transcriptional fusion from nucleotides -306 to +213                                             | [15]                |
| ppipB-cat                                              | pKK232-8 derivative containing a <i>pipB</i> - <i>cat</i> transcriptional fusion from nucleotides -737 to +70                                               | [15]                |
| psopB-cat                                              | pKK232-8 derivative containing a <i>sopB</i> - <i>cat</i> transcriptional fusion from nucleotides -400 to +128                                              | [15]                |
| pssaG-cat                                              | pKK232-8 derivative containing a <i>ssaG</i> - <i>cat</i> transcriptional fusion from nucleotides -232 to +361                                              | [15]                |
| pssrAB-cat                                             | pKK232-8 derivative containing a <i>ssrAB</i> - <i>cat</i> transcriptional fusion from nucleotides -303 to +3054                                            | [15]                |
| pMPMA3 $\Delta$ Plac null- <i>gfp</i> [LVA]/R          | P15A ori vector containing a promoterless <i>gfp</i> reporter gene encoding a destabilized variant of green fluorescent protein, GFP [LVA], Ap <sup>R</sup> | [116]               |
| pMPMA3 $\Delta$ Plac <i>PinvF</i> - <i>gfp</i> [LVA]/R | pMPMA3 $\Delta$ Plac null- <i>gfp</i> [LVA]/R derivative containing an <i>invF</i> - <i>gfp</i> transcriptional fusion                                      | [116]               |
| pRS414                                                 | pBR322 ori vector for the construction of translational fusions to the <i>lacZ</i> reporter gene, Ap <sup>R</sup>                                           | [103]               |
| philE-lacZ                                             | pRS414 derivative containing a <i>hilE</i> - <i>lacZ</i> translational fusion from nucleotides -424 to +49                                                  | This study          |
| pMPM-K3                                                | P15A ori cloning vector, <i>lac</i> promoter, Kan <sup>R</sup>                                                                                              | [104]               |
| pK3-CsrA                                               | pMPM-K3 derivative expressing CsrA from the <i>lac</i> promoter                                                                                             | [39]                |
| pK3-CsrB                                               | pMPM-K3 derivative expressing CsrB from the <i>lac</i> promoter                                                                                             | [39]                |
| pK3-SirA                                               | pMPM-K3 derivative expressing SirA from the <i>lac</i> promoter                                                                                             | [39]                |
| pMPM-K4 $\Omega$                                       | ColE1 ori vector, Kan <sup>R</sup>                                                                                                                          | [104]               |
| pK4-SirA                                               | pMPM-K4 $\Omega$ derivative expressing <i>sirA</i> from its own promoter                                                                                    | This study          |
| pMPM-K6 $\Omega$                                       | p15A ori vector, <i>ara</i> promoter, Kan <sup>R</sup>                                                                                                      | [104]               |
| pK6-HilD                                               | pMPM-K6 $\Omega$ derivative expressing HilD from the <i>ara</i> promoter, Kan <sup>R</sup>                                                                  | [31]                |

(Continued)

Table 1. (Continued)

| Strain or plasmid | Genotype or description                                                                    | Source or reference |
|-------------------|--------------------------------------------------------------------------------------------|---------------------|
| pK6-HilE          | pMPM-K6 $\Omega$ derivative expressing HilE from the <i>ara</i> promoter, Kan <sup>R</sup> | [38]                |
| pCP20             | Plasmid expressing FLP recombinase from a temperature-inducible promoter, Ap <sup>R</sup>  | [106]               |
| pSUB11            | pGP704 derivative template plasmid for FLAG epitope tagging                                | [105]               |

The coordinates of the nucleotides for the *cat* and *lacZ* fusions are relative to the transcriptional start site reported for each gene. Ap<sup>R</sup>, ampicillin resistance; Kan<sup>R</sup>, kanamycin resistance; Sm<sup>R</sup>, streptomycin resistance.

<https://doi.org/10.1371/journal.ppat.1009630.t001>

## Plasmids

Table 1 shows the plasmids used in this study. To construct the *phile-lacZ* plasmid, a DNA fragment spanning the full-length intergenic region upstream *hilE* and the first ten codons of this gene, was amplified by PCR with the primers HilE-EcoRI-Fw1 (5'-TTAAATGAATTCAC ATAGTAAATATGTTCTATTG-3') and HilE-BamHI-Rev1 (5'-GTTTTCAAGGATCCTGATCCGGCTTTTCGCCTTC-3'), containing sites for EcoRI and BamHI restriction enzymes, respectively (underlined in the sequences). The PCR product was digested with EcoRI and BamHI and ligated into the pRS414 vector [103] digested with the same enzymes. To construct the pK4-SirA plasmid, a DNA fragment spanning *sirA* and its upstream intergenic region was amplified by PCR with the primers SirAF (5'-GCCGGATCCATCGCCTGCAGCATCAGC-3') and SirARgfp (5'-ACCAAGCTTGTCATACATACGATAGACACCG-3'), containing sites for BamHI and HindIII restriction enzymes, respectively (underlined in the sequences). The PCR product was digested with BamHI and HindIII and ligated into the pMPM-K4 $\Omega$  vector [104] digested with the same enzymes. The constructed recombinant plasmids were characterized by PCR amplification and sequencing.

## Construction of mutants and strains expressing FLAG-tagged proteins

P22 transduction was used to transfer the  $\Delta$ *hilE::kan* allele from DTM56 into the WT *S. Typhimurium* SL1344 strain, generating DTM135, to transfer the  $\Delta$ *hilD::kan* allele from JPTM5 into DTM136, generating DTM137, and to transfer the *sirA::Tn10d* allele from CJ035 into the WT *S. Typhimurium* SL1344 and DTM136 strains, generating DTM140 and DTM141, respectively. The chromosomal *hilE* gene was FLAG-tagged in the WT *S. Typhimurium* 14028s strain by a previously reported method based on the  $\lambda$ Red recombinase system [105], using the primers HilE-FLAG-5' (5'-AGCAAAACACGGCGGCCTCTTCACCGACAGGCGCTGTGGCGA GACTACAAAGACCATGACGG-3') and HilE-FLAG-3' (5'-ATACAGCATCGCCCACTGC GAGTCCGCAAGCTTGTTTTGTCCCATATGAATATCCTCCTTAG-3'), generating DTM138; the sequences corresponding to the pSUB11 template plasmid are underlined. The kanamycin resistance cassette was excised from the JPTM41, JPTM43, DTM135 and DTM138 strains, by using helper plasmid pCP20 expressing the FLP recombinase, as described previously [106], generating strains DTM133, DTM134, DTM136 and DTM139, respectively. All modified strains were verified by PCR amplification and sequencing.

## Enzymatic assays

$\beta$ -galactosidase and chloramphenicol acetyltransferase (CAT) assays, as well as protein quantification to calculate the respective enzymatic specific activity, were performed as described previously [107,108].

## Flow cytometry analysis

Samples containing  $\sim 10^7$  cells were taken from bacterial cultures grown as described above. After washing with 0.22- $\mu\text{m}$ -pore-size filtered 1X phosphate-buffered saline (PBS), cells were fixed for 20 min at room temperature in 400  $\mu\text{l}$  of 2% (wt/vol) paraformaldehyde (Sigma) in 1X PBS. Fixed cells were centrifuged and resuspended in one ml of 1X PBS. GFP fluorescence was assessed on a FACSCanto II cytometer (BD Biosciences) equipped with the FACSDiva software (BD Biosciences). Data from 100 000 events were analyzed with the FlowJo v10 software (Tree Star Inc). Cells carrying the *gfp* reporter gene without a promoter were used to define the background level of fluorescence. Data shown represent the frequency of GFP positive cells.

## Western blotting

Preparation and visualization of immunoblots were performed as described previously [88]. Monoclonal anti-FLAG M2 (Sigma) or polyclonal anti-GroEL (StressGen) antibodies were used at 1:3,000 and 1:100,000 dilutions, respectively. Horseradish peroxidase-conjugated anti-mouse or anti-rabbit antibodies (Pierce) diluted at 1:10,000 were used as secondary antibodies.

## Electrophoretic mobility shift assays

The electrophoretic mobility shift assays (EMSAs) followed published procedures [109,110]. His-tagged CsrA (CsrA-H6) from *E. coli* was purified as described previously [111]. Note that CsrA from *E. coli* and *S. Typhimurium* are identical. RNA was synthesized *in vitro* using the RNA Maxx Transcription Kit (Agilent Technologies). PCR fragments used as templates in transcription reactions contained a T7 promoter and *hilE* sequence extending from +153 to +280 relative to the start of transcription. Gel-purified RNA was 5'-end labeled with [ $\gamma$ - $^{32}\text{P}$ ]-ATP (7,000 Ci/mmol). RNA suspended in Tris-EDTA (TE) buffer was heated to 85°C for 3 min followed by slow cooling at room temperature for 10 min. Binding reactions (10  $\mu\text{l}$ ) contained 10 mM Tris-HCl, pH 7.5, 10 mM MgCl<sub>2</sub>, 100 mM KCl, 200 ng/ $\mu\text{l}$  yeast RNA, 0.2 mg/ml bovine serum albumin (BSA), 7.5% glycerol, 20 mM dithiothreitol (DTT), 0.2 nM RNA, CsrA-H6 (various concentrations), and 0.1 mg/ml xylene cyanol. Competition assay mixtures also contained unlabeled competitor RNA. Reaction mixtures were incubated for 30 min at 37°C to allow CsrA-RNA complex formation. Samples were then fractionated through native 10% polyacrylamide gels using 0.5X Tris-borate-EDTA (TBE) as the gel running buffer. Radioactive bands were visualized with a Typhoon 9410 phosphorimager (GE Healthcare) and quantified using ImageQuant 5.2 software. Apparent equilibrium binding constants ( $K_d$ ) of CsrA-*hilE* RNA interaction were calculated as described previously [112].

## Competitive growth experiment

The WT *S. Typhimurium* SL1344 strain and its isogenic mutants were grown in 5 ml of LB at 37°C with shaking, until the cultures reached an OD<sub>600nm</sub> of 0.6. Next, mixed cultures were started by inoculating an equal amount of the initial culture of the respective strains (500  $\mu\text{l}$  + 500  $\mu\text{l}$ ) in 250-ml flasks containing 50 ml of fresh LB without antibiotics, which were incubated at 37°C with shaking for 8 h. At 0, 2, 4, 6 and 8 h, culture samples were taken to determine colony forming units (CFUs) of each strain, by plating serial dilutions in 1X PBS on LB agar supplemented with the indicated antibiotics. For the WT+ $\Delta$ *hilE*::*kan*, WT+ $\Delta$ *hilD*::*kan* and WT+ $\Delta$ *hilE*  $\Delta$ *hilD*::*kan* mixed cultures, CFUs of the  $\Delta$ *hilE*::*kan*,  $\Delta$ *hilD*::*kan* or  $\Delta$ *hilE*  $\Delta$ *hilD*::*kan* mutants (kanamycin and streptomycin resistant) were obtained directly from the count on LB agar + kanamycin/streptomycin plates, whereas CFUs of the WT strain (streptomycin

resistant, kanamycin susceptible) were determined by subtracting the number of CFUs on LB agar + kanamycin/streptomycin plates from that of CFUs on LB agar + streptomycin plates. For the  $\Delta sirA/pMPPM-K3+\Delta hilE sirA::Tn10d/pMPPM-K3$  and  $\Delta sirA/pK3-SirA+\Delta hilE sirA::Tn10d/pK3-SirA$  mixed cultures, CFUs of the  $\Delta hilE sirA::Tn10d/pMPPM-K3$  and  $\Delta hilE sirA::Tn10d/pK3-SirA$  strains (kanamycin, tetracycline and streptomycin resistant) were obtained directly from the count on LB agar + kanamycin/tetracycline/streptomycin plates, whereas CFUs of the  $\Delta sirA/pMPPM-K3$  and  $\Delta sirA/pK3-SirA$  strains (kanamycin and streptomycin resistant, tetracycline susceptible) were determined by subtracting the number of CFUs on LB agar + kanamycin/tetracycline/streptomycin plates from that of CFUs on LB agar + kanamycin/streptomycin plates. To compare the growth of the two strains in the respective mixed culture (competitive growth), the number of CFUs for each strain is indicated as a fraction (percentage).

### Competitive index assay

Pathogen-free BALB/c female mice (6- to 7-week-old) were obtained from the Experimental Medicine Research Unit, School of Medicine, UNAM, México. Maintenance, streptomycin treatment (50 mg) and euthanasia of the mice were performed as described previously [113]. Overnight cultures of the WT *S. Typhimurium* SL1344 strain and its isogenic  $\Delta hilE$ ,  $\Delta hilD$  and  $\Delta hilE \Delta hilD$  mutants were diluted 1:100 in 5 ml of fresh LB and incubated at 37°C with shaking for about 3 h. Then, bacterial suspensions containing  $0.5 \times 10^7$  CFUs/ml of each the WT strain and the respective mutant (WT +  $\Delta hilE$ , WT +  $\Delta hilD$  or WT +  $\Delta hilE \Delta hilD$ ) were prepared in 1X PBS. Next, groups of eight streptomycin-pretreated mice were infected by orogastric route with 100  $\mu$ l of the corresponding bacterial suspension. At 3 days post-infection, cecum and feces were harvested aseptically and homogenized in 1 ml of sterile and cold 1X PBS, solubilized in 2% Triton X-100, serially diluted and differentially plated on LB agar plates containing streptomycin or kanamycin to determine CFUs/mg. The number of CFUs for each strain was obtained as described in Competitive growth experiment. The competitive index was calculated by dividing the total CFUs of mutant strain by the total CFUs of the WT strain.

### Statistical analysis

Data analyses were performed using GraphPad Prism version 6.0c for Mac OS X, GraphPad Software, La Jolla, California USA, using One-way ANOVA followed by Tukey's multiple comparisons posttest. *P*-values < 0.05 were considered statistically significant.

### Acknowledgments

We thank A. Téllez-Galván for helping with competitive growth experiments; C. Paredes-Amaya for constructing the *phlE-lacZ* plasmid; L. C. Martínez for helping during early stages of this study; F. J. Santana, M. Fernández-Mora and A. F. Flores-Alcantar for technical assistance; E. Calva for providing resources and facilities for some CAT assays; O. Steele-Mortimer and J.A. Ibarra for providing plasmids carrying *gfp*, and I. Martínez-Flores for critical reading of the manuscript.

### Author Contributions

**Conceptualization:** Víctor H. Bustamante.

**Formal analysis:** Deyanira Pérez-Morales, Paul Babitzke, Víctor H. Bustamante.

**Funding acquisition:** Miguel A. De la Cruz, Paul Babitzke, Víctor H. Bustamante.

**Investigation:** Deyanira Pérez-Morales, Jessica Nava-Galeana, Roberto Rosales-Reyes, Paige Teehan, Helen Yakhnin, Erika I. Melchy-Pérez, Miguel A. De la Cruz.

**Methodology:** Roberto Rosales-Reyes, Yvonne Rosenstein, Paul Babitzke, Víctor H. Bustamante.

**Supervision:** Paul Babitzke, Víctor H. Bustamante.

**Writing – original draft:** Víctor H. Bustamante.

**Writing – review & editing:** Deyanira Pérez-Morales, Yvonne Rosenstein, Paul Babitzke, Víctor H. Bustamante.

## References

1. Haraga A, Ohlson MB, Miller SI. Salmonellae interplay with host cells. *Nat Rev Microbiol.* 2008; 6(1):53–66. <https://doi.org/10.1038/nrmicro1788> PMID: 18026123.
2. Fàbrega A, Vila J. *Salmonella enterica* serovar Typhimurium skills to succeed in the host: virulence and regulation. *Clin Microbiol Rev.* 2013; 26(2):308–41. Epub 2013/04/05. <https://doi.org/10.1128/CMR.00066-12> PMID: 23554419.
3. Deng W, Marshall NC, Rowland JL, McCoy JM, Worrall LJ, Santos AS, et al. Assembly, structure, function and regulation of type III secretion systems. *Nat Rev Microbiol.* 2017; 15(6):323–37. Epub 2017/04/11. <https://doi.org/10.1038/nrmicro.2017.20> PMID: 28392566.
4. Ilyas B, Tsai CN, Coombes BK. Evolution of *Salmonella*-host cell interactions through a dynamic bacterial genome. *Front Cell Infect Microbiol.* 2017; 7:428. Epub 2017/10/17. <https://doi.org/10.3389/fcimb.2017.00428> PMID: 29034217.
5. Dos Santos AMP, Ferrari RG, Conte-Junior CA. Virulence factors in *Salmonella* Typhimurium: the sagacity of a bacterium. *Curr Microbiol.* 2019; 76(6):762–73. Epub 2018/05/23. <https://doi.org/10.1007/s00284-018-1510-4> PMID: 29785632.
6. Knodler LA, Vallance BA, Celli J, Winfree S, Hansen B, Montero M, et al. Dissemination of invasive *Salmonella* via bacterial-induced extrusion of mucosal epithelia. *Proc Natl Acad Sci USA.* 2010; 107(41):17733–8. Epub 2010/09/30. <https://doi.org/10.1073/pnas.1006098107> PMID: 20876119.
7. Laughlin RC, Knodler LA, Barhoumi R, Payne HR, Wu J, Gomez G, et al. Spatial segregation of virulence gene expression during acute enteric infection with *Salmonella enterica* serovar Typhimurium. *MBio.* 2014; 5(1):e00946–13. Epub 2014/02/06. <https://doi.org/10.1128/mBio.00946-13> PMID: 24496791.
8. Lawhon SD, Maurer R, Suyemoto M, Altier C. Intestinal short-chain fatty acids alter *Salmonella* Typhimurium invasion gene expression and virulence through BarA/SirA. *Mol Microbiol.* 2002; 46(5):1451–64. <https://doi.org/10.1046/j.1365-2958.2002.03268.x> PMID: 12453229.
9. Altier C. Genetic and environmental control of *Salmonella* invasion. *J Microbiol.* 2005; 43 Spec No:85–92. PMID: 15765061.
10. Hung CC, Garner CD, Slauch JM, Dwyer ZW, Lawhon SD, Frye JG, et al. The intestinal fatty acid propionate inhibits *Salmonella* invasion through the post-translational control of HilD. *Mol Microbiol.* 2013; 87(5):1045–60. Epub 2013/01/08. <https://doi.org/10.1111/mmi.12149> PMID: 23289537.
11. Golubeva YA, Ellermeier JR, Cott Chubiz JE, Slauch JM. Intestinal long-chain fatty acids act as a direct signal to modulate expression of the *Salmonella* pathogenicity island 1 type III secretion system. *MBio.* 2016; 7(1):e02170–15. <https://doi.org/10.1128/mBio.02170-15> PMID: 26884427.
12. Eade CR, Hung CC, Bullard B, Gonzalez-Escobedo G, Gunn JS, Altier C. Bile acids function synergistically to repress invasion gene expression in *Salmonella* by destabilizing the invasion regulator HilD. *Infect Immun.* 2016. <https://doi.org/10.1128/IAI.00177-16> PMID: 27185788.
13. Kim K, Golubeva YA, Vanderpool CK, Slauch JM. Oxygen-dependent regulation of SPI1 type three secretion system by small RNAs in *Salmonella enterica* serovar Typhimurium. *Mol Microbiol.* 2019; 111(3):570–87. Epub 2018/11/30. <https://doi.org/10.1111/mmi.14174> PMID: 30484918.
14. Lundberg U, Vinatzer U, Berdnik D, von Gabain A, Baccharini M. Growth phase-regulated induction of *Salmonella*-induced macrophage apoptosis correlates with transient expression of SPI-1 genes. *J Bacteriol.* 1999; 181(11):3433–7. <https://doi.org/10.1128/JB.181.11.3433-3437.1999> PMID: 10348855.
15. Bustamante VH, Martínez LC, Santana FJ, Knodler LA, Steele-Mortimer O, Puente JL. HilD-mediated transcriptional cross-talk between SPI-1 and SPI-2. *Proc Natl Acad Sci USA.* 2008; 105(38):14591–6. <https://doi.org/10.1073/pnas.0801205105> PMID: 18799744.



16. Sridhar S, Steele-Mortimer O. Inherent variability of growth media impacts the ability of *Salmonella* Typhimurium to interact with host cells. PLoS One. 2016; 11(6):e0157043. Epub 2016/06/10. <https://doi.org/10.1371/journal.pone.0157043> PMID: 27280414.
17. Hautefort I, Proenca MJ, Hinton JC. Single-copy green fluorescent protein gene fusions allow accurate measurement of *Salmonella* gene expression *in vitro* and during infection of mammalian cells. Appl Environ Microbiol. 2003; 69(12):7480–91. Epub 2003/12/09. <https://doi.org/10.1128/AEM.69.12.7480-7491.2003> PMID: 14660401.
18. Schlumberger MC, Muller AJ, Ehrbar K, Winnen B, Duss I, Stecher B, et al. Real-time imaging of type III secretion: *Salmonella* SipA injection into host cells. Proc Natl Acad Sci USA. 2005; 102(35):12548–53. Epub 2005/08/19. <https://doi.org/10.1073/pnas.0503407102> PMID: 16107539.
19. Sturm A, Heinemann M, Arnoldini M, Benecke A, Ackermann M, Benz M, et al. The cost of virulence: retarded growth of *Salmonella* Typhimurium cells expressing type III secretion system 1. PLoS Pathog. 2011; 7(7):e1002143. Epub 2011/08/11. <https://doi.org/10.1371/journal.ppat.1002143> PMID: 21829349.
20. Diard M, Garcia V, Maier L, Remus-Emsermann MN, Regoes RR, Ackermann M, et al. Stabilization of cooperative virulence by the expression of an avirulent phenotype. Nature. 2013; 494(7437):353–6. Epub 2013/02/22. <https://doi.org/10.1038/nature11913> PMID: 23426324.
21. Sánchez-Romero MA, Casadesús J. Contribution of SPI-1 bistability to *Salmonella enterica* cooperative virulence: insights from single cell analysis. Sci Rep. 2018; 8(1):14875. Epub 2018/10/07. <https://doi.org/10.1038/s41598-018-33137-z> PMID: 30291285.
22. Ackermann M, Stecher B, Freed NE, Songhet P, Hardt WD, Doebeli M. Self-destructive cooperation mediated by phenotypic noise. Nature. 2008; 454(7207):987–90. Epub 2008/08/23. <https://doi.org/10.1038/nature07067> PMID: 18719588.
23. Golubeva YA, Sadik AY, Ellermeier JR, Slauch JM. Integrating global regulatory input into the *Salmonella* pathogenicity island 1 type III secretion system. Genetics. 2012; 190(1):79–90. Epub 2011/10/25. <https://doi.org/10.1534/genetics.111.132779> PMID: 22021388.
24. Lou L, Zhang P, Piao R, Wang Y. *Salmonella* pathogenicity island 1 (SPI-1) and its complex regulatory network. Front Cell Infect Microbiol. 2019; 9:270. Epub 2019/08/21. <https://doi.org/10.3389/fcimb.2019.00270> PMID: 31428589.
25. Banda MM, Manzo R, Bustamante VH. HilD induces expression of a novel *Salmonella* Typhimurium invasion factor, YobH, through a regulatory cascade involving SprB. Sci Rep. 2019; 9(1):12725. Epub 2019/09/06. <https://doi.org/10.1038/s41598-019-49192-z> PMID: 31484980.
26. Smith C, Stringer AM, Mao C, Palumbo MJ, Wade JT. Mapping the regulatory network for *Salmonella enterica* serovar Typhimurium invasion. mBio. 2016; 7(5). Epub 2016/09/08. <https://doi.org/10.1128/mBio.01024-16> PMID: 27601571.
27. Martínez LC, Banda MM, Fernández-Mora M, Santana FJ, Bustamante VH. HilD induces expression of *Salmonella* pathogenicity island 2 genes by displacing the global negative regulator H-NS from *ssrAB*. J Bacteriol. 2014; 196(21):3746–55. Epub 2014/08/20. <https://doi.org/10.1128/JB.01799-14> PMID: 25135218.
28. Banda MM, Zavala-Alvarado C, Pérez-Morales D, Bustamante VH. SlyA and HilD counteract H-NS-mediated repression on the *ssrAB* virulence operon of *Salmonella enterica* serovar Typhimurium and thus promote its activation by OmpR. J Bacteriol. 2019; 201(8). Epub 2019/02/06. <https://doi.org/10.1128/JB.00530-18> PMID: 30718301.
29. Singer HM, Kuhne C, Deditius JA, Hughes KT, Erhardt M. The *Salmonella* Spi1 virulence regulatory protein HilD directly activates transcription of the flagellar master operon *flhDC*. J Bacteriol. 2014; 196(7):1448–57. Epub 2014/02/04. <https://doi.org/10.1128/JB.01438-13> PMID: 24488311.
30. Mouslim C, Hughes KT. The effect of cell growth phase on the regulatory cross-talk between flagellar and Spi1 virulence gene expression. PLoS Pathog. 2014; 10(3):e1003987. Epub 2014/03/08. <https://doi.org/10.1371/journal.ppat.1003987> PMID: 24603858.
31. Martínez-Flores I, Pérez-Morales D, Sánchez-Pérez M, Paredes CC, Collado-Vides J, Salgado H, et al. *In silico* clustering of *Salmonella* global gene expression data reveals novel genes co-regulated with the SPI-1 virulence genes through HilD. Sci Rep. 2016; 6:37858. <https://doi.org/10.1038/srep37858> PMID: 27886269.
32. Petrone BL, Stringer AM, Wade JT. Identification of HilD-regulated genes in *Salmonella enterica* serovar Typhimurium. J Bacteriol. 2014; 196(5):1094–101. Epub 2014/01/01. <https://doi.org/10.1128/JB.01449-13> PMID: 24375101.
33. Ellermeier CD, Ellermeier JR, Slauch JM. HilD, HilC and RtsA constitute a feed forward loop that controls expression of the SPI1 type three secretion system regulator *hilA* in *Salmonella enterica* serovar Typhimurium. Mol Microbiol. 2005; 57(3):691–705. <https://doi.org/10.1111/j.1365-2958.2005.04737.x> PMID: 16045614.

34. Saini S, Ellermeier JR, Slauch JM, Rao CV. The role of coupled positive feedback in the expression of the SPI1 type three secretion system in *Salmonella*. PLoS Pathog. 2010; 6(7):e1001025. Epub 2010/08/06. <https://doi.org/10.1371/journal.ppat.1001025> PMID: 20686667.
35. Narm KE, Kalafatis M, Slauch JM. HilD, HilC, and RtsA form homodimers and heterodimers to regulate expression of the *Salmonella* pathogenicity island I type III secretion system. J Bacteriol. 2020; 202(9). Epub 2020/02/12. <https://doi.org/10.1128/JB.00012-20> PMID: 32041797.
36. Baxter MA, Fahlen TF, Wilson RL, Jones BD. HilE interacts with HilD and negatively regulates *hilA* transcription and expression of the *Salmonella enterica* serovar Typhimurium invasive phenotype. Infect Immun. 2003; 71(3):1295–305. <https://doi.org/10.1128/IAI.71.3.1295-1305.2003> PMID: 12595445.
37. Grenz JR, Cott Chubiz JE, Thaprawat P, Slauch JM. HilE regulates HilD by blocking DNA binding in *Salmonella enterica* serovar Typhimurium. J Bacteriol. 2018; 200(8). Epub 2018/01/31. <https://doi.org/10.1128/JB.00750-17> PMID: 29378886.
38. Paredes-Amaya CC, Valdes-García G, Juárez-González VR, Rudino-Pinera E, Bustamante VH. The Hcp-like protein HilE inhibits homodimerization and DNA binding of the virulence-associated transcriptional regulator HilD in *Salmonella*. J Biol Chem. 2018; 293(17):6578–92. Epub 2018/03/15. <https://doi.org/10.1074/jbc.RA117.001421> PMID: 29535187.
39. Martínez LC, Yakhnin H, Camacho MI, Georgellis D, Babitzke P, Puente JL, et al. Integration of a complex regulatory cascade involving the SirA/BarA and Csr global regulatory systems that controls expression of the *Salmonella* SPI-1 and SPI-2 virulence regulons through HilD. Mol Microbiol. 2011; 80(6):1637–56. <https://doi.org/10.1111/j.1365-2958.2011.07674.x> PMID: 21518393.
40. Johnston C, Pegues DA, Hueck CJ, Lee A, Miller SI. Transcriptional activation of *Salmonella* Typhimurium invasion genes by a member of the phosphorylated response-regulator superfamily. Mol Microbiol. 1996; 22(4):715–27. <https://doi.org/10.1046/j.1365-2958.1996.d01-1719.x> PMID: 8951818.
41. Altier C, Suyemoto M, Ruiz AI, Burnham KD, Maurer R. Characterization of two novel regulatory genes affecting *Salmonella* invasion gene expression. Mol Microbiol. 2000; 35(3):635–46. Epub 2000/02/15. <https://doi.org/10.1046/j.1365-2958.2000.01734.x> PMID: 10672185.
42. Teplitski M, Goodier RI, Ahmer BM. Pathways leading from BarA/SirA to motility and virulence gene expression in *Salmonella*. J Bacteriol. 2003; 185(24):7257–65. <https://doi.org/10.1128/JB.185.24.7257-7265.2003> PMID: 14645287.
43. Lapouge K, Schubert M, Allain FH, Haas D. Gac/Rsm signal transduction pathway of gamma-proteobacteria: from RNA recognition to regulation of social behaviour. Mol Microbiol. 2008; 67(2):241–53. Epub 2007/12/01. <https://doi.org/10.1111/j.1365-2958.2007.06042.x> PMID: 18047567.
44. Vakulskas CA, Potts AH, Babitzke P, Ahmer BM, Romeo T. Regulation of bacterial virulence by Csr (Rsm) systems. Microbiol Mol Biol Rev. 2015; 79(2):193–224. <https://doi.org/10.1128/MMBR.00052-14> PMID: 25833324.
45. Romeo T, Babitzke P. Global regulation by CsrA and its RNA antagonists. Microbiol Spectr. 2018; 6(2). Epub 2018/03/25. <https://doi.org/10.1128/microbiolspec.RWR-0009-2017> PMID: 29573256.
46. Martínez LC, Martínez-Flores I, Salgado H, Fernández-Mora M, Medina-Rivera A, Puente JL, et al. *In silico* identification and experimental characterization of regulatory elements controlling the expression of the *Salmonella csrB* and *csrC* genes. J Bacteriol. 2014; 196(2):325–36. Epub 2013/11/05. <https://doi.org/10.1128/JB.00806-13> PMID: 24187088.
47. Hung CC, Eade CR, Betteken MI, Pavinski Bitar PD, Handley EM, Nugent SL, et al. *Salmonella* invasion is controlled through the secondary structure of the *hilD* transcript. PLoS Pathog. 2019; 15(4): e1007700. Epub 2019/04/25. <https://doi.org/10.1371/journal.ppat.1007700> PMID: 31017982.
48. Altier C, Suyemoto M, Lawhon SD. Regulation of *Salmonella enterica* serovar Typhimurium invasion genes by *csrA*. Infect Immun. 2000; 68(12):6790–7. <https://doi.org/10.1128/IAI.68.12.6790-6797.2000> PMID: 11083797.
49. Holmqvist E, Wright PR, Li L, Bischler T, Barquist L, Reinhardt R, et al. Global RNA recognition patterns of post-transcriptional regulators Hfq and CsrA revealed by UV crosslinking *in vivo*. EMBO J. 2016; 35(9):991–1011. Epub 2016/04/06. <https://doi.org/10.15252/embj.201593360> PMID: 27044921.
50. Fortune DR, Suyemoto M, Altier C. Identification of CsrC and characterization of its role in epithelial cell invasion in *Salmonella enterica* serovar Typhimurium. Infect Immun. 2006; 74(1):331–9. <https://doi.org/10.1128/IAI.74.1.331-339.2006> PMID: 16368988.
51. Schechter LM, Damrauer SM, Lee CA. Two AraC/XylS family members can independently counteract the effect of repressing sequences upstream of the *hilA* promoter. Mol Microbiol. 1999; 32(3):629–42. <https://doi.org/10.1046/j.1365-2958.1999.01381.x> PMID: 10320584.

52. Schechter LM, Lee CA. AraC/XylS family members, HilC and HilD, directly bind and derepress the *Salmonella* Typhimurium *hilA* promoter. *Mol Microbiol.* 2001; 40(6):1289–99. <https://doi.org/10.1046/j.1365-2958.2001.02462.x> PMID: 11442828.
53. Akbar S, Schechter LM, Lostrich CP, Lee CA. AraC/XylS family members, HilD and HilC, directly activate virulence gene expression independently of HilA in *Salmonella* Typhimurium. *Mol Microbiol.* 2003; 47(3):715–28. <https://doi.org/10.1046/j.1365-2958.2003.03322.x> PMID: 12535071.
54. Fahlen TF, Mathur N, Jones BD. Identification and characterization of mutants with increased expression of *hilA*, the invasion gene transcriptional activator of *Salmonella* Typhimurium. *FEMS Immunol Med Microbiol.* 2000; 28(1):25–35. <https://doi.org/10.1111/j.1574-695X.2000.tb01453.x> PMID: 10767604.
55. Ahmer BM, van Reeuwijk J, Watson PR, Wallis TS, Heffron F. *Salmonella* SirA is a global regulator of genes mediating enteropathogenesis. *Mol Microbiol.* 1999; 31(3):971–82. Epub 1999/02/27. <https://doi.org/10.1046/j.1365-2958.1999.01244.x> PMID: 10048039.
56. Baxter MA, Jones BD. The *fimYZ* genes regulate *Salmonella enterica* serovar Typhimurium invasion in addition to type 1 fimbrial expression and bacterial motility. *Infect Immun.* 2005; 73(3):1377–85. Epub 2005/02/26. <https://doi.org/10.1128/IAI.73.3.1377-1385.2005> PMID: 15731035.
57. Saini S, Pearl JA, Rao CV. Role of FimW, FimY, and FimZ in regulating the expression of type 1 fimbriae in *Salmonella enterica* serovar Typhimurium. *J Bacteriol.* 2009; 191(9):3003–10. Epub 2009/02/17. <https://doi.org/10.1128/JB.01694-08> PMID: 19218381.
58. Espinosa E, Casadesús J. Regulation of *Salmonella enterica* pathogenicity island 1 (SPI-1) by the LysR-type regulator LeuO. *Mol Microbiol.* 2014; 91(6):1057–69. Epub 2013/12/21. <https://doi.org/10.1111/mmi.12500> PMID: 24354910.
59. Baxter MA, Jones BD. Two-component regulators control *hilA* expression by controlling *fimZ* and *hilE* expression within *Salmonella enterica* serovar Typhimurium. *Infect Immun.* 2015; 83(3):978–85. <https://doi.org/10.1128/IAI.02506-14> PMID: 25547794.
60. Barthel M, Hapfelmeier S, Quintanilla-Martínez L, Kremer M, Rohde M, Hogardt M, et al. Pretreatment of mice with streptomycin provides a *Salmonella enterica* serovar Typhimurium colitis model that allows analysis of both pathogen and host. *Infect Immun.* 2003; 71(5):2839–58. <https://doi.org/10.1128/IAI.71.5.2839-2858.2003> PMID: 12704158.
61. Hapfelmeier S, Stecher B, Barthel M, Kremer M, Müller AJ, Heikenwalder M, et al. The *Salmonella* pathogenicity island (SPI)-2 and SPI-1 type III secretion systems allow *Salmonella* serovar Typhimurium to trigger colitis via MyD88-dependent and MyD88-independent mechanisms. *J Immunol.* 2005; 174(3):1675–85. <https://doi.org/10.4049/jimmunol.174.3.1675> PMID: 15661931.
62. Sekirov I, Gill N, Jogova M, Tam N, Robertson M, de Llanos R, et al. *Salmonella* SPI-1-mediated neutrophil recruitment during enteric colitis is associated with reduction and alteration in intestinal microbiota. *Gut Microbes.* 2010; 1(1):30–41. <https://doi.org/10.4161/gmic.1.1.10950> PMID: 21327114.
63. Winter SE, Thiennimitr P, Winter MG, Butler BP, Huseby DL, Crawford RW, et al. Gut inflammation provides a respiratory electron acceptor for *Salmonella*. *Nature.* 2010; 467(7314):426–9. Epub 2010/09/25. <https://doi.org/10.1038/nature09415> PMID: 20864996.
64. Thiennimitr P, Winter SE, Winter MG, Xavier MN, Tolstikov V, Huseby DL, et al. Intestinal inflammation allows *Salmonella* to use ethanolamine to compete with the microbiota. *Proc Natl Acad Sci USA.* 2011; 108(42):17480–5. <https://doi.org/10.1073/pnas.1107857108> PMID: 21969563.
65. Faber F, Thiennimitr P, Spiga L, Byndloss MX, Litvak Y, Lawhon S, et al. Respiration of microbiota-derived 1,2-propanediol drives *Salmonella* expansion during colitis. *PLoS Pathog.* 2017; 13(1):e1006129. Epub 2017/01/06. <https://doi.org/10.1371/journal.ppat.1006129> PMID: 28056091.
66. Colgan AM, Kroger C, Diard M, Hardt WD, Puente JL, Sivasankaran SK, et al. The impact of 18 ancestral and horizontally-acquired regulatory proteins upon the transcriptome and sRNA landscape of *Salmonella enterica* serovar Typhimurium. *PLoS Genet.* 2016; 12(8):e1006258. <https://doi.org/10.1371/journal.pgen.1006258> PMID: 27564394.
67. Milo R, Shen-Orr S, Itzkovitz S, Kashtan N, Chklovskii D, Alon U. Network motifs: simple building blocks of complex networks. *Science.* 2002; 298(5594):824–7. Epub 2002/10/26. <https://doi.org/10.1126/science.298.5594.824> PMID: 12399590.
68. Alon U. Network motifs: theory and experimental approaches. *Nat Rev Genet.* 2007; 8(6):450–61. Epub 2007/05/19. <https://doi.org/10.1038/nrg2102> PMID: 17510665.
69. Mangan S, Alon U. Structure and function of the feed-forward loop network motif. *Proc Natl Acad Sci USA.* 2003; 100(21):11980–5. Epub 2003/10/08. <https://doi.org/10.1073/pnas.2133841100> PMID: 14530388.
70. Mangan S, Itzkovitz S, Zaslaver A, Alon U. The incoherent feed-forward loop accelerates the response-time of the *gal* system of *Escherichia coli*. *J Mol Biol.* 2006; 356(5):1073–81. Epub 2006/01/13. <https://doi.org/10.1016/j.jmb.2005.12.003> PMID: 16406067.

71. Goentoro L, Shoval O, Kirschner MW, Alon U. The incoherent feedforward loop can provide fold-change detection in gene regulation. *Mol Cell*. 2009; 36(5):894–9. Epub 2009/12/17. <https://doi.org/10.1016/j.molcel.2009.11.018> PMID: 20005851.
72. Hong J, Brandt N, Abdul-Rahman F, Yang A, Hughes T, Gresham D. An incoherent feedforward loop facilitates adaptive tuning of gene expression. *Elife*. 2018;7. Epub 2018/04/06. <https://doi.org/10.7554/eLife.32323> PMID: 29620523.
73. Kaplan S, Bren A, Dekel E, Alon U. The incoherent feed-forward loop can generate non-monotonic input functions for genes. *Mol Syst Biol*. 2008; 4:203. Epub 2008/07/17. <https://doi.org/10.1038/msb.2008.43> PMID: 18628744.
74. Durant JA, Corrier DE, Ricke SC. Short-chain volatile fatty acids modulate the expression of the *hilA* and *invF* genes of *Salmonella* Typhimurium. *J Food Prot*. 2000; 63(5):573–8. Epub 2000/05/29. <https://doi.org/10.4315/0362-028x-63.5.573> PMID: 10826713.
75. Huang Y, Suyemoto M, Garner CD, Cicconi KM, Altier C. Formate acts as a diffusible signal to induce *Salmonella* invasion. *J Bacteriol*. 2008; 190(12):4233–41. Epub 2008/04/22. <https://doi.org/10.1128/JB.00205-08> PMID: 18424519.
76. Chavez RG, Alvarez AF, Romeo T, Georgellis D. The physiological stimulus for the BarA sensor kinase. *J Bacteriol*. 2010; 192(7):2009–12. <https://doi.org/10.1128/JB.01685-09> PMID: 20118252.
77. Olekhnovich IN, Kadner RJ. DNA-binding activities of the HilC and HilD virulence regulatory proteins of *Salmonella enterica* serovar Typhimurium. *J Bacteriol*. 2002; 184(15):4148–60. <https://doi.org/10.1128/JB.184.15.4148-4160.2002> PMID: 12107132.
78. De la Cruz MA, Pérez-Morales D, Palacios IJ, Fernández-Mora M, Calva E, Bustamante VH. The two-component system CpxR/A represses the expression of *Salmonella* virulence genes by affecting the stability of the transcriptional regulator HilD. *Front Microbiol*. 2015; 6:807. <https://doi.org/10.3389/fmicb.2015.00807> PMID: 26300871.
79. Schechter LM, Jain S, Akbar S, Lee CA. The small nucleoid-binding proteins H-NS, HU, and Fis affect *hilA* expression in *Salmonella enterica* serovar Typhimurium. *Infect Immun*. 2003; 71(9):5432–5. <https://doi.org/10.1128/IAI.71.9.5432-5435.2003> PMID: 12933899.
80. Sittka A, Lucchini S, Papenfort K, Sharma CM, Rolle K, Binnewies TT, et al. Deep sequencing analysis of small noncoding RNA and mRNA targets of the global post-transcriptional regulator, Hfq. *PLoS Genet*. 2008; 4(8):e1000163. Epub 2008/08/30. <https://doi.org/10.1371/journal.pgen.1000163> PMID: 18725932.
81. Lim S, Yoon H, Kim M, Han A, Choi J, Choi J, et al. Hfq and ArcA are involved in the stationary phase-dependent activation of *Salmonella* pathogenicity island 1 (SPI1) under shaking culture conditions. *J Microbiol Biotechnol*. 2013; 23(12):1664–72. Epub 2013/09/11. <https://doi.org/10.4014/jmb.1305.05022> PMID: 24018968.
82. Jiang L, Feng L, Yang B, Zhang W, Wang P, Jiang X, et al. Signal transduction pathway mediated by the novel regulator LoiA for low oxygen tension induced *Salmonella* Typhimurium invasion. *PLoS Pathog*. 2017; 13(6):e1006429. Epub 2017/06/03. <https://doi.org/10.1371/journal.ppat.1006429> PMID: 28575106.
83. Gaviria-Cantin T, El Mouali Y, Le Guyon S, Romling U, Balsalobre C. Gre factors-mediated control of *hilD* transcription is essential for the invasion of epithelial cells by *Salmonella enterica* serovar Typhimurium. *PLoS Pathog*. 2017; 13(4):e1006312. Epub 2017/04/21. <https://doi.org/10.1371/journal.ppat.1006312> PMID: 28426789.
84. Ellermeier JR, Slauch JM. Fur regulates expression of the *Salmonella* pathogenicity island 1 type III secretion system through HilD. *J Bacteriol*. 2008; 190(2):476–86. Epub 2007/11/13. <https://doi.org/10.1128/JB.00926-07> PMID: 17993530.
85. Chubiz JE, Golubeva YA, Lin D, Miller LD, Slauch JM. FliZ regulates expression of the *Salmonella* pathogenicity island 1 invasion locus by controlling HilD protein activity in *Salmonella enterica* serovar Typhimurium. *J Bacteriol*. 2010; 192(23):6261–70. Epub 2010/10/05. <https://doi.org/10.1128/JB.00635-10> PMID: 20889744.
86. Olekhnovich IN, Kadner RJ. Role of nucleoid-associated proteins Hha and H-NS in expression of *Salmonella enterica* activators HilD, HilC, and RtsA required for cell invasion. *J Bacteriol*. 2007; 189(19):6882–90. <https://doi.org/10.1128/JB.00905-07> PMID: 17675384.
87. Vergnes A, Viala JP, Ouadah-Tsabet R, Pocachard B, Loiseau L, Meresse S, et al. The iron-sulfur cluster sensor IscR is a negative regulator of Spi1 type III secretion system in *Salmonella enterica*. *Cell Microbiol*. 2017; 19(4). Epub 2016/10/30. <https://doi.org/10.1111/cmi.12680> PMID: 27704705.
88. Pérez-Morales D, Banda MM, Chau NYE, Salgado H, Martínez-Flores I, Ibarra JA, et al. The transcriptional regulator SsrB is involved in a molecular switch controlling virulence lifestyles of *Salmonella*. *PLoS Pathog*. 2017; 13(7):e1006497. Epub 2017/07/14. <https://doi.org/10.1371/journal.ppat.1006497> PMID: 28704543.



89. Palmer AD, Kim K, Slauch JM. PhoP-mediated repression of the SPI1 type 3 secretion system in *Salmonella enterica* serovar Typhimurium. *J Bacteriol.* 2019; 201(16). Epub 2019/06/12. <https://doi.org/10.1128/JB.00264-19> PMID: 31182495.
90. López-Garrido J, Casadesús J. Crosstalk between virulence loci: regulation of *Salmonella enterica* pathogenicity island 1 (SPI-1) by products of the std fimbrial operon. *PLoS One.* 2012; 7(1):e30499. Epub 2012/02/01. <https://doi.org/10.1371/journal.pone.0030499> PMID: 22291968.
91. El Mouali Y, Gaviria-Cantin T, Sánchez-Romero MA, Gibert M, Westermann AJ, Vogel J, et al. CRP-cAMP mediates silencing of *Salmonella* virulence at the post-transcriptional level. *PLoS Genet.* 2018; 14(6):e1007401. Epub 2018/06/08. <https://doi.org/10.1371/journal.pgen.1007401> PMID: 29879120.
92. Takaya A, Kubota Y, Isogai E, Yamamoto T. Degradation of the HilC and HilD regulator proteins by ATP-dependent Lon protease leads to downregulation of *Salmonella* pathogenicity island 1 gene expression. *Mol Microbiol.* 2005; 55(3):839–52. <https://doi.org/10.1111/j.1365-2958.2004.04425.x> PMID: 15661008.
93. Hung CC, Eade CR, Altier C. The protein acyltransferase Pat post-transcriptionally controls HilD to repress *Salmonella* invasion. *Mol Microbiol.* 2016; 102(1):121–36. Epub 2016/06/25. <https://doi.org/10.1111/mmi.13451> PMID: 27341691.
94. Sang Y, Ren J, Ni J, Tao J, Lu J, Yao YF. Protein acetylation is involved in *Salmonella enterica* serovar Typhimurium virulence. *J Infect Dis.* 2016; 213(11):1836–45. Epub 2016/01/27. <https://doi.org/10.1093/infdis/jiw028> PMID: 26810370.
95. Sang Y, Ren J, Qin R, Liu S, Cui Z, Cheng S, et al. Acetylation regulating protein stability and DNA-binding ability of HilD, thus modulating *Salmonella* Typhimurium virulence. *J Infect Dis.* 2017; 216(8):1018–26. Epub 2017/03/23. <https://doi.org/10.1093/infdis/jix102> PMID: 28329249.
96. Gong H, Vu GP, Bai Y, Chan E, Wu R, Yang E, et al. A *Salmonella* small non-coding RNA facilitates bacterial invasion and intracellular replication by modulating the expression of virulence factors. *PLoS Pathog.* 2011; 7(9):e1002120. Epub 2011/09/29. <https://doi.org/10.1371/journal.ppat.1002120> PMID: 21949647.
97. Bondi R, Longo F, Messina M, D'Angelo F, Visca P, Leoni L, et al. The multi-output incoherent feed-forward loop constituted by the transcriptional regulators LasR and RsaL confers robustness to a subset of quorum sensing genes in *Pseudomonas aeruginosa*. *Mol Biosyst.* 2017; 13(6):1080–9. Epub 2017/05/04. <https://doi.org/10.1039/c7mb00040e> PMID: 28466892.
98. Ferrara S, Carloni S, Fulco R, Falcone M, Macchi R, Bertoni G. Post-transcriptional regulation of the virulence-associated enzyme AlgC by the  $\sigma^{22}$ -dependent small RNA ErsA of *Pseudomonas aeruginosa*. *Environ Microbiol.* 2015; 17(1):199–214. Epub 2014/09/05. <https://doi.org/10.1111/1462-2920.12590> PMID: 25186153.
99. Imam S, Noguera DR, Donohue TJ. Global analysis of photosynthesis transcriptional regulatory networks. *PLoS Genet.* 2014; 10(12):e1004837. Epub 2014/12/17. <https://doi.org/10.1371/journal.pgen.1004837> PMID: 25503406.
100. Mank NN, Berghoff BA, Hermanns YN, Klug G. Regulation of bacterial photosynthesis genes by the small noncoding RNA PcrZ. *Proc Natl Acad Sci USA.* 2012; 109(40):16306–11. Epub 2012/09/19. <https://doi.org/10.1073/pnas.1207067109> PMID: 22988125.
101. Mank NN, Berghoff BA, Klug G. A mixed incoherent feed-forward loop contributes to the regulation of bacterial photosynthesis genes. *RNA Biol.* 2013; 10(3):347–52. Epub 2013/02/09. <https://doi.org/10.4161/rna.23769> PMID: 23392242.
102. Lee EJ, Groisman EA. An antisense RNA that governs the expression kinetics of a multifunctional virulence gene. *Mol Microbiol.* 2010; 76(4):1020–33. Epub 2010/04/20. <https://doi.org/10.1111/j.1365-2958.2010.07161.x> PMID: 20398218.
103. Simons RW, Houman F, Kleckner N. Improved single and multicopy lac-based cloning vectors for protein and operon fusions. *Gene.* 1987; 53(1):85–96. Epub 1987/01/01. [https://doi.org/10.1016/0378-1119\(87\)90095-3](https://doi.org/10.1016/0378-1119(87)90095-3) PMID: 3596251.
104. Mayer MP. A new set of useful cloning and expression vectors derived from pBlueScript. *Gene.* 1995; 163(1):41–6. [https://doi.org/10.1016/0378-1119\(95\)00389-n](https://doi.org/10.1016/0378-1119(95)00389-n) PMID: 7557476.
105. Uzzau S, Figueroa-Bossi N, Rubino S, Bossi L. Epitope tagging of chromosomal genes in *Salmonella*. *Proc Natl Acad Sci USA.* 2001; 98(26):15264–9. <https://doi.org/10.1073/pnas.261348198> PMID: 11742086.
106. Datsenko KA, Wanner BL. One-step inactivation of chromosomal genes in *Escherichia coli* K-12 using PCR products. *Proc Natl Acad Sci USA.* 2000; 97(12):6640–5. <https://doi.org/10.1073/pnas.120163297> PMID: 10829079.
107. Oropeza R, Sampieri CL, Puente JL, Calva E. Negative and positive regulation of the non-osmoregulated *ompS1* porin gene in *Salmonella typhi*: a novel regulatory mechanism that involves OmpR. *Mol Microbiol.* 1999; 32(2):243–52. <https://doi.org/10.1046/j.1365-2958.1999.01329.x> PMID: 10231482.

108. Puente JL, Bieber D, Ramer SW, Murray W, Schoolnik GK. The bundle-forming pili of enteropathogenic *Escherichia coli*: transcriptional regulation by environmental signals. *Mol Microbiol.* 1996; 20(1):87–100. <https://doi.org/10.1111/j.1365-2958.1996.tb02491.x> PMID: 8861207.
109. Yakhnin H, Yakhnin AV, Baker CS, Sineva E, Berezin I, Romeo T, et al. Complex regulation of the global regulatory gene *csrA*: CsrA-mediated translational repression, transcription from five promoters by  $\sigma^{70}$  and  $\sigma^S$ , and indirect transcriptional activation by CsrA. *Mol Microbiol.* 2011; 81(3):689–704. Epub 2011/06/24. <https://doi.org/10.1111/j.1365-2958.2011.07723.x> PMID: 21696456.
110. Yakhnin AV, Yakhnin H, Babitzke P. Gel mobility shift assays to detect protein-RNA interactions. *Methods Mol Biol.* 2012; 905:201–11. Epub 2012/06/28. [https://doi.org/10.1007/978-1-61779-949-5\\_12](https://doi.org/10.1007/978-1-61779-949-5_12) PMID: 22736005.
111. Mercante J, Suzuki K, Cheng X, Babitzke P, Romeo T. Comprehensive alanine-scanning mutagenesis of *Escherichia coli* CsrA defines two subdomains of critical functional importance. *J Biol Chem.* 2006; 281(42):31832–42. Epub 2006/08/23. <https://doi.org/10.1074/jbc.M606057200> PMID: 16923806.
112. Yakhnin AV, Trimble JJ, Chiaro CR, Babitzke P. Effects of mutations in the L-tryptophan binding pocket of the Trp RNA-binding attenuation protein of *Bacillus subtilis*. *J Biol Chem.* 2000; 275(6):4519–24. Epub 2000/02/08. <https://doi.org/10.1074/jbc.275.6.4519> PMID: 10660627.
113. Banda MM, López C, Manzo R, Rico-Pérez G, García P, Rosales-Reyes R, et al. HilD and PhoP independently regulate the expression of *grhD1*, a novel gene required for *Salmonella* Typhimurium invasion of host cells. *Sci Rep.* 2018; 8(1):4841. Epub 2018/03/21. <https://doi.org/10.1038/s41598-018-23068-0> PMID: 29555922.
114. Hoiseth SK, Stocker BA. Aromatic-dependent *Salmonella* Typhimurium are non-virulent and effective as live vaccines. *Nature.* 1981; 291(5812):238–9. <https://doi.org/10.1038/291238a0> PMID: 7015147.
115. Brosius J. Plasmid vectors for the selection of promoters. *Gene.* 1984; 27(2):151–60. [https://doi.org/10.1016/0378-1119\(84\)90136-7](https://doi.org/10.1016/0378-1119(84)90136-7) PMID: 6327464.
116. Ibarra JA, Knodler LA, Sturdevant DE, Virtaneva K, Carmody AB, Fischer ER, et al. Induction of *Salmonella* pathogenicity island 1 under different growth conditions can affect *Salmonella*-host cell interactions *in vitro*. *Microbiology.* 2010; 156(Pt 4):1120–33. Epub 2009/12/26. <https://doi.org/10.1099/mic.0.032896-0> PMID: 20035008.
